1 **Title: Degrading intestinal DAF-2 nearly doubles *Caenorhabditis elegans* lifespan**  
2 **without affecting development or reproduction**

3 Authors: Yan-Ping Zhang<sup>1, 2\*</sup>, Wen-Hong Zhang<sup>1, 2\*</sup>, Pan Zhang<sup>1</sup>, Qi Li<sup>3</sup>, Yue Sun<sup>1</sup>, Jia-Wen  
4 Wang<sup>1</sup>, Shao-Bing O. Zhang<sup>3</sup>, Tao Cai<sup>1</sup>, Cheng Zhan<sup>1</sup>, Meng-Qiu Dong<sup>1, 2</sup>

5 **Affiliations:**

- 6 1. National Institute of Biological Sciences, Beijing, Beijing, China  
7 2. Beijing Key Laboratory of the Cell Biology of Animal Aging, Beijing, China  
8 3. Laboratory of Metabolic Genetics, College of Life Sciences, Capital Normal University,  
9 Beijing, China

10 \* These authors contributed equally to this work.

11 **Correspondence:**

12 M-Q.D., National Institute of Biological Sciences, Beijing, Beijing 102206, China  
13 Fax: 86-10-80706053  
14 Tel: 86-10-80706046  
15 E-mail: dongmengqiu@nibs.ac.cn

16 **Highlights**

- 17 1) *daf-2* and *daf-16* are expressed in most or all cells of *C. elegans* using genome editing.  
18 2) DAF-2 and DAF-16 both regulate lifespan from the intestine as determined using auxin-  
19 induced protein degradation.  
20 3) Reduced insulin signaling in the intestine nearly doubles *C. elegans* lifespan without adverse  
21 effects on development or reproduction.  
22 4) Lifespan regulation by genes and dietary restriction are unified by intestinal supply of  
23 nutrients and metabolism.

## 24 **Summary**

25 Twenty-eight years following the breakthrough discovery that a single-gene mutation of *daf-2*  
26 can double the lifespan of *Caenorhabditis elegans*, it remains unclear where this gene, which  
27 encodes an insulin/IGF-1 receptor, is expressed and where it acts to regulate aging. Here, by  
28 inserting DNA sequences of fluorescent tags into the genomic locus of *daf-2* and that of its  
29 downstream transcription factor *daf-16*, we determined that both genes are expressed in most  
30 or all tissues from embryos through adulthood, in line with their diverse functions. Using tissue-  
31 specific auxin-induced protein degradation, we determined that both DAF-2 and DAF-16 act  
32 in the intestine to regulate organismal aging. Strikingly, loss of DAF-2 in the intestine nearly  
33 doubled *C. elegans* lifespan but did not produce the adverse developmental or reproductive  
34 phenotypes associated with genetic *daf-2* mutants. These findings unify the mechanism of  
35 lifespan regulation by genes and that by dietary restriction, and begin to focus anti-aging  
36 research on nutrient supply.

## 37 **Introduction**

38 One of the breakthrough discoveries in biology from the last 30 years is the finding that ancient  
39 genetic pathways control animal lifespan (Kenyon, 2001; Kenyon, 2010; Narasimhan et al.,  
40 2009). The first identified and extensively validated one is the insulin/insulin-like growth factor  
41 1 (IGF-1) signaling (IIS) pathway (Guarente and Kenyon, 2000; Kenyon, 2011; Kenyon et al.,  
42 1993). Reduction of the IIS extends the lifespan in *Caenorhabditis elegans* (Friedman and  
43 Johnson, 1988; Kenyon et al., 1993; Morris et al., 1996), *Drosophila* (Clancy et al., 2001; Tatar  
44 et al., 2001), and mice (Bluher et al., 2003; Holzenberger et al., 2003). Moreover, single  
45 nucleotide polymorphisms (SNPs) of IIS component genes are tightly linked to human  
46 longevity (Pawlikowska et al., 2009; Suh et al., 2008; Willcox et al., 2008). Reducing IIS also  
47 alleviates pathologies of age-associated diseases in animal models, including those for  
48 Alzheimer's and Parkinson's (Cohen et al., 2009; El-Ami et al., 2014). These studies indicate  
49 that the IIS pathway is a promising target for developing anti-aging therapeutics. However,  
50 applying this knowledge in practice has not been possible because of the many essential  
51 functions of IIS, including glucose metabolism, lipid metabolism, growth, and reproduction  
52 (Barbieri et al., 2003; Piper et al., 2008; Saltiel and Kahn, 2001; Zhang and Liu, 2014).

53 In humans and other mammals, insulin and IGF peptides are synthesized in and secreted  
54 primarily from the pancreatic  $\beta$ -cells and the liver, respectively. They are carried by the  
55 bloodstream to target tissues where they bind to and activate their cell-surface receptors. In  
56 humans, both the insulin receptor (IR) and the IGF-1 receptor (IGF-1R) are expressed in nearly  
57 all tissues (<https://portal.brain-map.org/>). In mammals, studies of IIS mostly focus on  $\beta$ -cells,  
58 liver, muscle, and adipose tissue, where IIS is crucial in maintaining homeostasis of glucose  
59 metabolism and energy metabolism (Belfiore et al., 2017; Zhang and Liu, 2014). Given these  
60 essential functions, mutations of IRs are linked to several inheritable genetic diseases including  
61 type A insulin resistance syndrome, Donohue syndrome, and Rabson-Mendenhall syndrome  
62 (Plamper et al., 2018). In healthy people, sensitivity to insulin declines with age, accompanied  
63 by an increasing probability of developing serious chronic conditions such as type 2 diabetes  
64 and obesity (Boucher et al., 2014; Czech, 2017; Titchenell et al., 2017). As such, it was  
65 surprising when reduction of IIS was discovered to extend lifespan of *C. elegans* (Kenyon et

66 al., 1993). Interestingly, some forms of general IIS reduction are accompanied by a longevity  
67 phenotype in humans, mice, and dogs, although they also exhibit an undesirable growth  
68 retardation phenotype (Kenyon, 2010).

69 The *daf-2* gene encodes the sole *C. elegans* homolog of IR/IGF-1R (Kimura et al., 1997). Other  
70 core components of IIS include AGE-1/PI3-K, PDK-1, AKT-1/2, and DAF-16/FoxO (Kimura  
71 et al., 1997; Lin et al., 1997; Ogg et al., 1997; Paradis and Ruvkun, 1998; Pierce et al., 2001).  
72 The IIS kinase cascade, from DAF-2 to AKT-1/2, maintains a relatively short wild-type (WT)  
73 lifespan by inhibiting the transcription factor (TF) DAF-16. Loss-of-function (*lf*) mutations of  
74 the upstream kinases all produce a remarkable longevity phenotype in a *daf-16* dependent  
75 manner. For example, the canonical *daf-2(e1370)* allele doubles *C. elegans* lifespan, and the  
76 lifespan extension is completely abolished by deletion of *daf-16* (Kenyon et al., 1993).  
77 Reduction of *C. elegans* IIS from young adulthood produces a stronger longevity phenotype  
78 than reducing it in later periods (Dillin et al., 2002). In addition to a long lifespan, similar to  
79 mammals, *C. elegans* IIS mutants are highly pleiotropic, exhibiting varying degrees of  
80 developmental defects, reduced brood size, and increased fat storage (Gems et al., 1998;  
81 Kimura et al., 1997).

82 Various methods, from genetic mosaic analysis (Apfeld and Kenyon, 1998) to tissue-specific  
83 RNAi (Uno et al., 2021) or transgene rescue (Libina et al., 2003), have been tried to identify  
84 the different functions of IIS in *C. elegans*. Special emphasis has been placed on determining  
85 the tissue(s) from which IIS regulates lifespan, partly because this question has significant  
86 implications in itself, and partly because *C. elegans* is an excellent model for aging research.  
87 However, despite these efforts, no consensus has been reached: experimental data have  
88 suggested neurons (Wolkow et al., 2000), intestine (Libina et al., 2003), or multiple cell lineages  
89 (Apfeld and Kenyon, 1998) as the sites of lifespan regulation by IIS.

90 The main source of the confusion is that the exact expression pattern of *daf-2* is unknown. The  
91 *daf-2* gene is 50 kb long, with large introns, multiple transcription start sites and alternative  
92 splicing sites; there are also multiple, long cDNAs. These characteristics make it difficult to  
93 determine the expression pattern of *daf-2* with traditional transgene approaches.  
94 Immunostaining and *in situ* hybridization did not produce consistent results, either, with one  
95 showing DAF-2 in XXX cells and neurons (Kimura et al., 2011) and the other showing DAF-  
96 2 in the germline (Honnen et al., 2012). In contrast, independent studies using fluorescent  
97 transgene reporters all agree that *daf-16* is ubiquitously expressed in somatic tissues (Henderson  
98 and Johnson, 2001; Kwon et al., 2010; Lee et al., 2001; Lin et al., 2001).

99 In this study, using CRISPR/Cas9 genome editing technology and tissue-specific targeted  
100 protein degradation system, we determined the endogenous expression patterns of *daf-2* and  
101 *daf-16* and their sites of action in lifespan regulation. We found that DAF-2 and DAF-16 are  
102 both expressed ubiquitously in the somatic and reproductive tissues, and that both regulate  
103 aging of the entire body from the intestine without interfering with development and  
104 reproduction. Further, degrading intestinal DAF-2 nearly doubles *C. elegans* lifespan. These  
105 findings suggest that genetic regulation of aging by IIS operates by affecting nutrient supply  
106 from the intestine to the entire body, thus inducing metabolic changes at the organismal level.  
107 The evolutionarily conserved lifespan regulating mechanisms including IIS and mTOR

108 signaling all sense nutrients. Hence, we postulate that genetic regulation of aging as well as  
109 dietary regulation of aging of various forms including caloric restriction, dietary restriction, and  
110 intermittent feeding, must converge on the downstream metabolic pathways. Our data suggest  
111 that down-regulation of protein synthesis is a molecular signature of longevity. These findings  
112 provide insights that unify the superficially diverse anti-aging mechanisms and point a way to  
113 achieving longevity without adverse effects in development and reproduction.

## 114 **Results**

### 115 **1. Insulin/IGF-1 receptor, a master regulator of aging, is widely expressed in *C. elegans*** 116 **from embryos to adults.**

117 To ensure accurate detection of the endogenous expression pattern of *daf-2*, we designed two  
118 detection strategies, one focusing on the protein, the other on the mRNA (Figure 1A).

119 To visualize the DAF-2 protein, we knocked in the CDS of mNeonGreen, a green fluorescent  
120 protein four times as bright as the jellyfish GFP (Shaner et al., 2013), immediately after the last  
121 amino acid codon of the *daf-2* gene on chromosome III (Figure 1A). Phenotypic assays showed  
122 that this mNeonGreen tag did not perturb the function of the DAF-2 protein to which it was  
123 attached (Figure S1). DAF-2::mNeonGreen was detected in neurons, XXX cells, vulval cells,  
124 germ cells, and oocytes (Figure 2B). In the last three types of cells, DAF-2::mNeonGreen had  
125 clear plasma membrane (PM) localization as expected for a cell surface receptor. In the neurons  
126 and XXX cells (Figure 1B), a pair of specialized hypodermal cells of neural endocrine function,  
127 strong DAF-2::mNeonGreen signals were seen in the cell bodies and along processes. In  
128 addition, the fluorescence signal appeared to originate from both the PM and the cytoplasm,  
129 presumably from intracellular membranes along the synthesis and secretion pathways of  
130 proteins targeted to the PM. Presence of DAF-2 in vulval cells was not suggested before, but  
131 Nadkimon et al. (2012) showed that *daf-2(lf)* suppressed the multivulva phenotype induced by  
132 hyperactivation of RAS/MAPK signaling (Nadkimon et al., 2012). Therefore, the above results  
133 indicate a cell-autonomous regulatory function of IIS in vulval development. The DAF-  
134 2::mNeonGreen-expressing neurons included all of the ciliated sensory neurons marked by the  
135 *osm-6* promoter-driven mCherry protein (Figure S2A).

136 Because DAF-2 is localized on the PM, it may be difficult to detect using the mNeonGreen tag  
137 in cells with large surface area where the signal may be too thin. Therefore, we took an  
138 alternative approach to visualize the cells expressing *daf-2* mRNA. Downstream of the *daf-2*  
139 CDS, we knocked in the sequence of an intercistronic region (ICR) from the *C. elegans* SL2-  
140 type operon, followed by a nuclear localization sequence (NLS), the CDS of GFP, the CDS of  
141 mNeonGreen, and another NLS, which we referred to as the Nuclear Ultrabright  
142 GFP::mNeonGreen Fluorescent protein (NuGFP) cassette (Figure 1A). In this approach,  
143 expression of NuGFP is tied to that of *daf-2* from the endogenous locus, but after trans-splicing,  
144 the NuGFP protein is synthesized independently of DAF-2. This high-sensitivity *daf-2*  
145 expression reporter was readily detectable in most *C. elegans* cells, including the ones that had  
146 been missed by the DAF-2::mNeonGreen fusion protein marker, that is, the intestine,  
147 hypodermis, gonadal sheath, and BWM (Figure 1C). With NuGFP, expression of *daf-2* was  
148 observed starting in 2-cell embryos, and the expression continued throughout development and

149 adulthood (Figure 1D and Figure S2B-S2G).

## 150 **2. The FoxO transcription factor is widely expressed in *C. elegans* from embryos to adults.**

151 To visualize the pattern of endogenous expression of *daf-16*, we knocked in the coding sequence  
152 (CDS) of the green fluorescent protein (GFP) right before the stop codon of the *daf-16* CDS on  
153 chromosome III using the CRISPR/Cas9 genome editing technique (Figure 2A). Other than  
154 illuminating the endogenously expressed DAF-16 proteins, the GFP tag did not interfere with  
155 DAF-16 function (Figure S1).

156 In unstressed animals, such as those kept at standard culture conditions (15-20 °C, well-fed),  
157 DAF-16::GFP was dispersed throughout the cell. To better recognize cells expressing DAF-  
158 16::GFP, we induced nuclear translocation of DAF-16::GFP by placing the worms on a glass  
159 slide atop an agarose cushion for about 5 minutes before epifluorescence imaging. We found  
160 that DAF-16::GFP was expressed ubiquitously in most or all somatic tissues, such as neurons,  
161 intestine, body wall muscles (BWM), and hypodermis, and also in the germ cells and oocytes  
162 (Figure 2B). Germline expression of DAF-16::GFP was not detected by earlier transgene  
163 reporters (Henderson and Johnson, 2001; Kwon et al., 2010; Lee et al., 2001; Lin et al., 2001).  
164 Temporally, ubiquitous expression of DAF-16::GFP from the endogenous locus started during  
165 embryonic development at the bean stage and persisted through larval development and  
166 adulthood (Figure 2C-2E and Figure S3).

## 167 **3. Insulin/IGF-1 receptor controls lifespan from the intestine.**

168 To settle the controversy regarding the site of action of insulin signaling in lifespan regulation,  
169 we adopted the auxin-induced protein degradation (AID) system (Zhang et al., 2015) (Figure  
170 S4A). This system allowed us to achieve tissue-specific DAF-2 or DAF-16 degradation in the  
171 WT or the long-lived *daf-2(e1370)* mutant background, respectively.

172 Using CRISPR/Cas9 technology, we generated knocking-in strains respectively expressing  
173 DAF-2::degron::mNeonGreen (Figure 1A) or DAF-16::GFP::degron (Figure 2A) from the  
174 endogenous *daf-2* or *daf-16* locus. The double tag of a degron sequence and a fluorescent  
175 protein sequence enables facile detection of the expression of the fusion protein and auxin-  
176 induced target protein degradation. Next, to the existing single-copy insertion (SCI) strains  
177 expressing TIR-1 in all cells (*ieSi57*), intestinal cells (*ieSi61*), or germ cells (*ieSi38*), we added  
178 neuron-, hypodermis-, BWM-, gonadal-sheath-, and XXX-cell-specific TIR-1 expressing lines  
179 by replacing the promoter sequence of *eft-3* or *sun-1* with that of *rgef-1*, *dpy-7*, *myo-3*, *lim-7*,  
180 or *eak-4* (Figure S4B). The above TIR-1 expressing chromosomes II or IV were each combined  
181 with the DAF-2::degron::mNeonGreen or DAF-16::GFP::degron chromosome through genetic  
182 crossing. Auxin-induced tissue-specific degradation of fluorescently labeled DAF-2 or DAF-  
183 16 was verified (Figure S4C-S4J and Figure S5).

184 Next, we examined the effect of tissue-specific degradation of DAF-2 on lifespan (Figure 3 and  
185 Table S1). We found that degrading neuronal DAF-2 increased WT lifespan by 18.6% (Figure  
186 3A), much less than what would be expected from previous *daf-2(lf)* rescue experiments using  
187 the tissue-specific-promoter-driven transgene arrays (Wolkow et al., 2000). Degrading DAF-2  
188 in the germline or the hypodermis respectively increased lifespan by 6.4% and 13.7% (Figure

189 3B and 3C), whereas degrading DAF-2 in the BWM, gonadal sheath, or XXX cells had no  
190 effect on lifespan (Figure 3D-3F). In contrast, degrading intestinal DAF-2 extended the *C.*  
191 *elegans* lifespan by 94.3% (Figure 3G). The above results showed unambiguously that intestinal  
192 DAF-2 is essential in lifespan regulation; neuronal, hypodermal, and germline DAF-2 each play  
193 a minor role, while DAF-2 has no detectable effect in other tissues.

194 Of note, the worms in which DAF-2 was degraded throughout the body had a lifespan that was  
195 266.5% of the WT (Figure 3H), outliving the canonical hypomorph *daf-2(e1370)* mutant and  
196 the intestinal DAF-2 AID worms, whose lifespans were 205.9% and 192.1% of the WT,  
197 respectively (Figure 3H). Here, FUDR was used to prevent the strong egg-laying defective (Egl)  
198 phenotype of whole-body DAF-2 AID from interfering with the lifespan assay. A strong Egl  
199 phenotype causes internal hatching of eggs. Degrading DAF-2 in the intestine or the other  
200 tissues (Figure 3A-3G) caused no obvious Egl phenotype.

201 The data above argue unequivocally that the insulin/IGF-1 receptor regulates aging of the entire  
202 body from the intestine, not neurons. This has implications beyond clarifying the purported role  
203 of neuronal DAF-2 in lifespan regulation (Wolkow, 2000), which has generated both excitement  
204 and uncertainty. Given that the intestine supplies nutrients to the entire body and insulin  
205 signaling regulates metabolism (Saltiel and Kahn, 2001; Zhang and Liu, 2014), it makes sense  
206 that IIS controls animal aging from an organ or tissue that is the center of nutrient supply. In  
207 addition, the above results suggest that lifespan regulation by genes and by dietary restriction  
208 likely share common downstream mechanisms. The clear lifespan extension (whole-body  
209 DAF-2 AID 166.5% > intestine 94.3% + neuron 18.6% + hypodermis 13.7% + germline 6.4%  
210 + others 0%) is a reminder that aging is a systems phenomenon involving cooperation among  
211 different tissues.

#### 212 **4. Intestinal FoxO mediates lifespan extension by reduced insulin/IGF-1 signaling.**

213 The longevity phenotype of *daf-2(e1370)* is fully dependent on *daf-16* (Kenyon et al., 1993),  
214 therefore one obvious question is in which tissue DAF-16 mediates this effect. Degrading DAF-  
215 16 in the *daf-2(e1370)* background in a tissue-specific manner (Figure 4 and Table S1) in the  
216 neurons, germline, or hypodermis shortened the *daf-2(e1370)* lifespan by no more than 15.6%  
217 (Figure 4A-4C), while degrading DAF-16 in BWM, gonadal sheath, or XXX cells had no effect  
218 (Figure 4D-4F). In comparison, degrading intestinal DAF-16 shortened the *daf-2(e1370)*  
219 lifespan by 40.1% (Figure 4G), which means that intestinal DAF-16 mediated 90.3% of the  
220 lifespan extension by *daf-2(e1370)*. Degrading DAF-16 throughout the body shortened the *daf-*  
221 *2(e1370)* lifespan by 57.6%, making it slightly shorter than the lifespan of WT animals at 44.4%  
222 of the *daf-2(e1370)* lifespan (Figure 4H). The effects of tissue-specific DAF-16 degradation  
223 resonated those of tissue-specific DAF-2 degradation on WT lifespan (Figure 3), and clearly  
224 indicate that the intestine is the single most important tissue from which IIS regulates lifespan.

225 Further supporting the above conclusion, we found that endogenously expressed DAF-16::GFP  
226 from a KI allele (Figure 2) accumulated in the intestinal nuclei after intestinal DAF-2 was  
227 degraded (Figure 4I). Nuclear accumulation is a sign of DAF-16 activation, due to alleviation  
228 of the inhibitory phosphorylation by AKT-1/2 on DAF-16 following inactivation of AKT kinase  
229 or the upstream kinases AGE-1 and DAF-2 (Kimura et al., 1997; Lin et al., 1997; Ogg et al.,

230 1997; Paradis and Ruvkun, 1998; Pierce et al., 2001). In adult animals, nuclear accumulation  
231 of DAF-16::GFP was seen only in the intestine following degradation of DAF-2 in the same  
232 tissue. Moreover, 72.7% of the extra lifespan gained by degrading intestinal DAF-2 required  
233 intestinal DAF-16 (Figure 4J). Taken together, these results demonstrate that 90% of the  
234 lifespan extension from reducing IIS originates in the intestine, and it requires activation of  
235 DAF-16 in the same cells.

## 236 **5. Intestine-specific degradation of insulin/IGF-1 receptor extends lifespan without** 237 **developmental or reproductive defects.**

238 Having established that the intestine is the control center for lifespan regulation by IIS, we  
239 asked whether lifespan extension may occur without causing the other pleiotropic phenotypes  
240 associated with traditional *daf-2* alleles (Gems et al., 1998). We found that intestine-specific  
241 degradation of DAF-2, which nearly doubled lifespan (Figure 3G and Figure 4G) caused no  
242 developmental abnormality, nor reproductive defects (Figure 5).

243 Compared to the canonical *daf-2(e1370)* allele—whose remarkable longevity is accompanied  
244 by mild pleiotropic phenotypes, including 100% dauer formation at 25 °C or ~0.5% at 20 °C  
245 (Gems et al., 1998)—intestinal degradation of DAF-2 caused 0% dauer formation at 25 °C  
246 (Figure 5A). The developmental rate of the *daf-2(e1370)* mutant was also significantly slower  
247 than WT. A total of 92.3% of freshly laid WT eggs developed into adults after 64 hours at 20 °C,  
248 while 81.8% of the *daf-2(e1370)* population were still at the L3 stage. With 93.8% of the  
249 population reaching L4 or adulthood under the same conditions, the intestinal DAF-2 AID  
250 worms developed faster than the *daf-2(e1370)* worms and slightly slower than WT (Figure 5B).

251 With respect to brood size, *daf-2(e1370)* animals laid an average of 203 eggs per worm at 20 °C,  
252 which is 25% fewer than WT. In contrast, there was no difference in the number of eggs laid  
253 per worm between the intestinal DAF-2 AID worms and control worms (Figure 5C).

254 For the lipid storage phenotype, we found that degrading intestinal DAF-2 elevated the  
255 triacylglycerol (TAG) content by 2.4-fold relative to the control animals, which recapitulated  
256 the metabolic phenotype of the *daf-2(e1370)* mutant (Figure 5D). Among all the pleiotropic  
257 phenotypes examined, this lipid storage phenotype is the only one that remains associated with  
258 the long-lived intestinal DAF-2 AID worms. In short, by degrading DAF-2 only in the intestine,  
259 the longevity effect was successfully separated from undesirable developmental and  
260 reproductive effects associated with a general reduction of IIS.

## 261 **6. The long-lived animals lacking the insulin/IGF-1 receptor in the intestine redefine the** 262 **molecular signature of longevity.**

263 A multitude of downstream effects of IIS means numerous affected genes. A study of 75  
264 publicly available microarray datasets comparing *daf-2(-)* versus *daf-2(-); daf-16(-)* has  
265 identified 3,396 DAF-16 target genes, of which 1,663 are up-regulated (Class I targets) and  
266 1,733 are down-regulated (Class II targets) when DAF-16 is active (Tepper et al., 2013). Our  
267 next-generation RNA-seq analysis of *daf-2(e1370)* versus WT (N2) worms uncovered 2,463  
268 differentially expressed genes (DEGs) ( $p$ . adjust<0.05), with 1,509 up-regulated and 953 down-

269 regulated in *daf-2(e1370)* worms (Figure 6A, left panel). Contrasting the KEGG pathways  
270 enriched from the Class I or Class II targets (Figure 6A, middle panel) and those from the RNA-  
271 seq data, it is evident that RNA-seq data revealed extensive down-regulation of multiple  
272 pathways related to metabolism of proteins and RNA (Figure 6A, right panel). Decreased  
273 protein metabolism in long-lived *daf-2* worms has been found repeatedly in previous  
274 proteomics studies and was shown to contribute positively to the longevity of *daf-2* worms  
275 (Stout et al., 2013). Here, we show that this information is in the transcriptome data, discernable  
276 using gene set enrichment analysis (GSEA) (Figure 6A, right panel).

277 We reasoned that with its “clean” longevity phenotype, intestine-specific DAF-2 degradation  
278 could help separate gene expression changes associated with longevity from those associated  
279 with the developmental or reproductive phenotypes of *daf-2* worms. We thus conducted RNA-  
280 seq analysis of worms subjected to tissue-specific degradation of DAF-2. The RNA-seq data of  
281 three biological replicates (Figure S6A) showed that the gene expression changes induced by  
282 degrading DAF-2 in the intestine and degrading DAF-2 in the whole body are more similar to  
283 each other than either is to the other treatments (Figure 6B and Figure S6B-S6F). For both, the  
284 up-regulated genes were enriched in fatty acid degradation and peroxisome, and the down-  
285 regulated genes were enriched in pathways related to protein metabolism, RNA metabolism,  
286 and DNA repair (Figure 6B). “Longevity regulating pathway-worm” was also enriched from  
287 the up-regulated genes in the intestinal DAF-2 AID worms at a  $q$  value  $<0.05$  (Figure S7A).

288 Notably, RNA-seq analysis underscored down-regulation of genes functioning in protein and  
289 RNA metabolism as common features shared by *daf-2(e1370)*, whole-body, and intestine-  
290 specific DAF-2 AID (Figure 6A and 6B). Previous studies have shown that decreasing protein  
291 synthesis extends lifespan (Depuydt et al., 2013; Lan et al., 2019; Pan et al., 2007; Syntichaki  
292 et al., 2007; Tiku et al., 2017) and accounts for ~40% of the lifespan extension by *daf-2(e1370)*  
293 (Li et al., 2021). In comparison, little is known about how down-regulation of RNA metabolism  
294 contributes to *daf-2* longevity.

295 Since ribosomal RNAs constitute the majority of total cellular RNA, we quantified the rRNAs  
296 using qRT-PCR. We found that in the *daf-2* mutant, 5S, 18S, and 26S rRNAs all decreased to  
297 less than 26% of the WT level (Figure 6C, left panel), while ITS1 and ITS2, which represents  
298 the precursor rRNA (pre-rRNA), also decreased to 52% and 34%, respectively (Figure 6C, right  
299 panel). Knocking down *fib-1*, which encodes the *C. elegans* fibrillarlin, an enzyme that catalyzes  
300 2'-O-methylation of pre-rRNA and U6 snRNA (Hasler et al., 2020; Iyer-Bierhoff et al., 2018),  
301 further extended the lifespan of *daf-2(e1370)* worms (Figure 6D). Knocking down *M28.5/snu-*  
302 *13*, which encodes another conserved protein functioning in rRNA processing and mRNA  
303 splicing (Marmier-Gourrier et al., 2003), also significantly extended the *daf-2* lifespan.  
304 Although knocking down *M28.5/snu-13* did not affect WT lifespan (Figure S7B), knocking  
305 down *fib-1* in WT animals resulted in a longevity phenotype (Tiku et al., 2017; Tiku et al., 2018).  
306 These data suggest that a reduction in RNA metabolism contributes positively to *daf-2* longevity.

307 In summary, intestine-specific degradation of DAF-2 helps identify core gene expression  
308 changes underlying the longevity phenotypes of *daf-2* worms, including up-regulation of fatty  
309 acid metabolism and peroxisome, and down-regulation of RNA and protein metabolism. These  
310 are shared molecular signatures of longevity following different ways of IIS reduction.



## 311 **7. Cross-tissue effect of intestinal insulin/IGF-1 signaling involves non-intestinal FoxO.**

312 The finding that degrading DAF-2 specifically in the intestine nearly doubled *C. elegans*  
313 lifespan raised another question, namely, whether and how intestinal IIS affects other tissues.  
314 To address this question, we constructed tissue-specific GFP reporters in the intestinal DAF-2  
315 AID strain, with which we isolated the cells of interest from day 1 adults either treated with  
316 auxin or untreated, for tissue-specific RNA-seq (Figure 7A, Figure S8A and S8B). Principal  
317 component analysis (PCA) of the RNA-seq data showed clear distinctions between tissues and  
318 between treatments (Figure S8C).

319 From the isolated intestinal, hypodermal, neuronal, and BWM cells, we found 508, 212, 209,  
320 and 26 DEGs, respectively, as a result of degrading DAF-2 in the intestine (Figure S8D). These  
321 data demonstrate a clear cross-tissue effect of intestinal IIS on hypodermis and neurons. That  
322 only 26 DEGs were found in muscle cells echoes the finding that IIS in muscles is insignificant  
323 in lifespan regulation.

324 Gene ontology (GO) analysis of DEGs of different tissues revealed an intriguing pattern (Figure  
325 7B). Among the ten up-regulated genes that responded to degradation of intestinal DAF-2, eight  
326 of the enriched GO terms seen in at least two tissue types are related to protein phosphorylation.  
327 GO terms enriched from the down-regulated genes are related predominantly to protein and  
328 RNA metabolism, which re-confirms the finding from whole worm RNA-seq data (Figure 6A,  
329 right panel, Figure 6B). The intestine displayed a higher degree of similarity with the  
330 hypodermis than with the neurons, but down-regulation of structural constituents of ribosome  
331 and translation is a shared transcriptional response among all three tissues (Figure 7B).  
332 Therefore, decreased protein synthesis, an important mechanism for IIS longevity (Li et al.,  
333 2021), is propagated from the intestine to other tissues. Decreased protein synthesis is also a  
334 molecular signature of longevity by Dietary Restriction (DR) (Kapahi, 2010; Lan et al., 2019;  
335 Stout et al., 2013).

336 Moderate enrichments of Class I and Class II DAF-16 targets were found among hypodermal  
337 and neuronal DEGs (Figure S8E), suggesting that DAF-16 may be activated to some degree in  
338 these strains in the absence of intestinal DAF-2. Supporting this idea, four Class I DAF-16  
339 targets were induced outside the intestine following degradation of intestinal DAF-2 (Figure  
340 7C, Figure S8G and S8H). In addition, intestinal DAF-2 degradation induced nuclear  
341 accumulation of DAF-16::GFP in the hypodermis during the L1-L2 stage (Figure 7D and Figure  
342 S8F).

343 We then asked whether lifespan extension by intestinal DAF-2 degradation requires DAF-16.  
344 We knocked in a tagBFP::degron tag to the genomic locus of *daf-16*, thereby subjecting the  
345 expressed tagBFP::degron fusion protein to auxin-induced tissue-specific degradation (Figure  
346 7E). To degrade intestinal DAF-2 in the same animals, we knocked in a GFP sequence to the  
347 *daf-2* locus and expressed a GFP nanobody::ZIF-1 fusion protein under an intestinal promoter  
348 (Wang et al., 2017). Unlike the AID system, GFP-mediated degradation of DAF-2 was  
349 incomplete, but enough to extend lifespan by 49.5% (Figure 7F, top panel). We found that  
350 degrading DAF-16 in the hypodermis, but not in the neurons, moderately but significantly  
351 shortened the lifespan of worms in which intestinal DAF-2 level was reduced (Figure 7F,  
352 middle and bottom panel). The DAF-16 binding site was also enriched among the hypodermal

353 DEGs following the removal of intestinal DAF-2 (Figure 7G). Therefore, we conclude that  
354 hypodermal DAF-16 is activated by the loss of intestinal DAF-2 and contributes to longevity.

355 From the tissue-specific RNA-seq data, we also found evidence suggesting the involvement of  
356 other TFs. The PQM-1 and SKN-1 binding sites were significantly enriched in 1-kb promoter  
357 sequence of the hypodermal and neuronal DEGs (Figure 7G). These two TFs are required for  
358 *daf-2* longevity (Tepper et al., 2013; Tullet et al., 2008). Induction of *gst-30*, which is not a  
359 DAF-16 target, was seen in a head neuron after intestinal DAF-2 was degraded (Figure 7C).

360 Taken together, the above data demonstrate that loss of intestinal DAF-2 induces gene  
361 expression changes in other tissues and that there is cross-tissue DAF-2 to DAF-16 signaling.

## 362 Discussion

363 In contrast to the diverse pleiotropic phenotypes of *daf-2* mutants, previous studies reported  
364 restricted and differing expression patterns of *daf-2*, either in neurons and XXX cells based on  
365 immunostaining (Kimura et al., 2011) or in the germline based on *in situ* hybridization (Honnen  
366 et al., 2012). In this study, we found that in addition to neurons, XXX cells, germ cells, and  
367 vulval cells—which display the brightest DAF-2::mNeonGreen signal on the cell surface—the  
368 *daf-2* gene is also expressed in the intestine, hypodermis, muscles, and gonadal sheath. We  
369 believe that this expression pattern is accurate and complete for the following reasons. First,  
370 we engineered the genomic loci of the *daf-2* and *daf-16* genes to label their endogenous protein  
371 products with fluorescent tags (Figure 1 and Figure 2), thereby avoiding artifacts associated with  
372 transgene reporters. Because all the DAF-2 isoforms share the same C-termini, and so do all  
373 the DAF-16 isoforms, the C-terminal mNeonGreen or GFP tag should label all DAF-2 or DAF-  
374 16 proteins. Second, we developed an ultra-sensitive tagging method (Figure 1A), with which  
375 we found that most or all *C. elegans* cells express *daf-2* mRNA (Figure 1C). This ubiquitous  
376 expression pattern of *daf-2* overlaps perfectly with that of its downstream TF *daf-16*, and is  
377 consistent with the many pleiotropic phenotypes of *daf-2* mutants. For example, mutations of  
378 *daf-2* increase lipid storage in the intestine, promote dauer formation during development  
379 (which involves the hypodermis producing a dauer cuticle), and suppress induction of multiple  
380 vulvae (Nakdimon et al., 2012). Prior to this study, *daf-2* expression had not been detected in  
381 the intestine, hypodermis, and vulval cells, where the above phenotypes are found.

382 Anti-aging by reducing neuronal IIS has been an attractive idea since expression of a *daf-2*  
383 transgene under a neuronal promoter, but not a muscle or intestinal promoter, was found to  
384 suppress the longevity phenotypes of the *daf-2* mutant (Wolkow et al., 2000). However,  
385 transgenic expression of *daf-16* under an intestinal promoter, but not a neuronal or muscle  
386 promoter, extended the lifespan of the *daf-2*; *daf-16* double mutant (Libina et al., 2003). The  
387 fact that *daf-2* RNAi readily extends lifespan (Dillin et al., 2002) also casts doubt on this idea  
388 because *C. elegans* neurons are refractory to RNAi (Fraser et al., 2000; Kamath et al., 2001).  
389 Recently, it was reported that neuronal and intestinal *daf-2* knockout both extend WT lifespan  
390 by ~50% (Uno et al., 2021), as did neuronal and intestinal degradation of DAF-2 (BioRxiv,  
391 2021). A third study showed that intestine-specific DAF-16 degradation shorted the lifespan of  
392 *daf-2(e1370)* mutant (Aghayeva et al., 2021). Here, we showed that intestine or neuron-specific  
393 degradation of DAF-2 extended lifespan by 94.3% or 18.6%, respectively. Hence, a consensus

394 is forming that intestinal DAF-2 has a substantial effect on lifespan regulation but there is no  
395 consensus yet regarding neuronal DAF-2. To solve this controversy, each of the above  
396 experiments must be examined to ensure the absence or reduction of neuronal DAF-2 and the  
397 intactness of intestinal DAF-2. None of the above studies showed direct evidence of the latter,  
398 and only this study showed direct evidence of the former. Our study is the only one so far that  
399 determined the expression pattern of *daf-2*, and the DAF-2::mNeonGreen or *daf-*  
400 *2::degron::mNeonGreen* KI strain should be a useful tool to visualize the effect of *daf-2*  
401 knockdown, knock out, or DAF-2 protein degradation in neurons. Pertaining to the intactness  
402 of intestinal DAF-2 in our degradation experiments of neuronal DAF-2, although the weak  
403 intestinal DAF-2::mNeonGreen signal did not provide a direct readout, we reason that intestinal  
404 DAF-2 was not affected when neuronal DAF-2 was degraded based on the following: (1)  
405 neuronal DAF-2 was verifiably degraded; (2) this treatment extended lifespan by 18.6%; (3)  
406 intestine-specific degradation of DAF-2 extended lifespan by 94.3%; and (4) if the 18.6%  
407 lifespan extension had resulted from an unintended loss of intestinal DAF-2, it would further  
408 refute the idea of IIS regulating lifespan from neurons.

409 Related to this, mechanistic studies of how certain neuronal changes extend lifespan, e.g. the  
410 mitochondrial unfolded protein response (UPR<sup>m</sup>), expression of XBP-1s, and activating  
411 neuronal CRTCL-1, often identify the intestine as the responsive organ (Burkewitz et al., 2015;  
412 Durieux et al., 2011; Imanikia et al., 2019; Rera et al., 2013; Zhang et al., 2018b). Many  
413 signaling pathways that influence lifespan converge on DAF-16, including IIS, AMPK  
414 signaling, mitochondrial signaling, CRCT-1, and germline signaling (Burkewitz et al., 2015;  
415 Kenyon, 2010). Activation of intestinal DAF-16, in particular, underlies a growing number of  
416 lifespan-extending conditions, including germline ablation (Berman and Kenyon, 2006; Libina  
417 et al., 2003; Lin et al., 2001), overexpression of HSF-1 in neurons (Douglas et al., 2015),  
418 temperature-dependent lifespan regulation by IL1 and ASJ neurons (Zhang et al., 2018a), and  
419 the classic case of lowering IIS (Libina et al., 2003; Uno et al., 2021); this study). Lifespan  
420 extension by activating intestinal DAF-16 is not unique to *C. elegans*. The worm intestine, in  
421 addition to being a digestive tract, doubles as an adipose tissue. In mice, adipose tissue-specific  
422 knockout of insulin receptor (FIRKO mice) extends lifespan (Blucher et al., 2003), and intestinal  
423 epithelium-specific knockout of IR alleviates insulin resistance in aged animals (Ussar et al.,  
424 2017). Both treatments activate the mammalian counterpart of DAF-16, the FoxO TFs, in the  
425 IR KO cells. It would be interesting to find out whether intestine-epithelium-specific knock-  
426 out of IR extends lifespan in the mouse model.

427 Based on the findings in mice described above and the finding in *C. elegans* that depletion of  
428 intestinal DAF-2 doubles lifespan without adverse developmental or reproductive effects (this  
429 study and Venz et al., 2021, BioRxiv), we suggest that intestine-specific reduction of IIS is a  
430 potentially promising approach to fight against aging in mammals.

431 The intestine supplies nutrients to the entire body, making it plausible that intestinal IIS may  
432 regulate organismal aging by altering nutrient supply. IIS is a master regulator of glucose  
433 metabolism and lipid metabolism across the animal kingdom (Chatterjee and Perrimon, 2021;  
434 Zhang and Liu, 2014). In *C. elegans*, IIS also positively regulates protein synthesis (Li et al.,  
435 2021; Stout et al., 2013). The transcriptional changes shared by whole-body and intestine-  
436 specific DAF-2 degradation include up-regulation of peroxisome and fatty acid degradation,

437 and down-regulation of RNA and protein metabolism. We speculate that these altered metabolic  
438 pathways subsequently alter the export of nutrients such as the building blocks of lipids, RNAs,  
439 and proteins out of the intestine to the other tissues.

440 In light of our findings, the genetic regulation of lifespan by IIS and the dietary regulation of  
441 lifespan are unified in the intestine, in nutrition and metabolism, and in down-regulation of  
442 protein synthesis. These likely represent the nexus of additional anti-aging strategies because  
443 the intestine is frequently found to be the responsive tissue or organ downstream of many  
444 lifespan-extending conditions, as discussed above. We therefore think that these findings will  
445 help focus the ever-expanding directions of aging research.

## 446 **Methods**

### 447 ***Carenorhabditis elegans* Maintenance**

448 Nematodes were maintained at 20 °C on standard nematode growth medium (NGM) agar plates  
449 seeded with *Escherichia coli* OP50 unless otherwise stated (Brenner, 1974).

### 450 **Strain construction**

#### 451 **1) Transgenic strains**

452 To generate transgenic animals carrying extrachromosomal arrays (hqEx), 5-50 ng/μl of the  
453 indicated plasmid was injected to the gonad using standard method.

#### 454 **2) Knocking-in strains**

455 CRISPR engineering for all knocking-ins was performed by microinjection using the  
456 homologous recombination approach (Dickinson et al., 2013). The injection mix contained at  
457 least two Cas9-sgRNAs expressing plasmids (50 ng/ μl for each), a selection marker pRF4 (*rol-*  
458 *6(su1006)*, with roller phenotype) (50 ng / μl), and a homologous recombination plasmid (50  
459 ng/μl). To generate the sgRNA plasmids, primers were designed with the CRISPR DESIGN  
460 tool (<https://zlab.bio/guide-design-resources>) and inserted into the pDD162 vector (Addgene)  
461 using the site-directed mutagenesis kit (TOYOBO). To generate the homologous recombination  
462 (HR) plasmids, two homologous arms (~1,000 bp each) corresponding to the 5'- and 3'-sides  
463 of the insertion site, respectively, were cloned into the vector. All injection plasmids were  
464 purified with PureLink PCR Micro kit (Invitrogen) and injected into the gonad of young adult  
465 hermaphrodite worms using standard method. F1s with roller phenotype were singled on a new  
466 NGM plate and allowed to produce sufficient offspring. Successful knock-in events were  
467 screened by PCR genotyping from independent F1 transgenic animals' progeny that did not  
468 display roller phenotype, and further confirmed by DNA sequencing.

469 Strains and sgRNAs used in this study are listed in Table S2 and Table S3, respectively.

### 470 **Confocal imaging**

471 Confocal image of Figure 1D (left panel) was captured by ZEISS LSM 880 microscope  
472 equipped with a 63×, 1.4 numerical aperture oil-immersion objective as Z-stacks of 1 μm-thick  
473 slices under the lambda-mode (settings: pixel dwell: 2.06 μs; average: line 1; master gain: 750;

474 pinhole size: 91  $\mu\text{m}$ ; filter: 411-695 nm; beam splitter: MBS 488; lasers: 488 nm, 30 %). Images  
475 were processed using ZEN software (Carl Zeiss Inc.).

476 All other confocal images were taken using the spinning-disk microscope (UltraVIEW VOX;  
477 PerkinElmer) equipped with a 63 $\times$ , 1.4 numerical aperture oil-immersion objective, except for  
478 those in Figure 7A (left panel) and Figure S8 (G-H) taken using 10 $\times$  objective. Images were  
479 viewed and processed using Volocity software (PerkinElmer).

480 Worms were anaesthetized using 1 mM levamisole hydrochloride in water on 3 % agarose pads  
481 on glass slides. In all the imaging studies, images within the same figure panel were taken with  
482 the same parameter and adjusted with identical parameters using ImageJ software.

### 483 **Auxin treatment**

484 Auxin treatment was performed by transferring worms to OP50-seeded NGM plates containing  
485 1 mM auxin as previously described (Zhang et al., 2015). Briefly, the 400 mM natural auxin  
486 indole-3-acetic acid (IAA) (Alfa Aesar) stock solution in ethanol was prepared freshly. Then,  
487 the stock solution was added into the NGM agar cooled to about 50  $^{\circ}\text{C}$  in water bath before  
488 pouring plates. For all auxin treatment experiments, 0.25% ethanol was used as a control. 100  
489  $\mu\text{l}$  of OP50 overnight culture was seeded onto the auxin or control NGM agar plates (60 x 15  
490 mm). Aluminum foil was used to protect the auxin-containing plates with from light, and then  
491 kept plates at room temperature for 1-2 days before use.

### 492 **Lifespan analysis**

493 All lifespan assays were performed at 20  $^{\circ}\text{C}$  unless otherwise stated. Strains were synchronized  
494 by allowing 40 gravid adults to lay eggs for 4 hours on OP50-seeded NGM plates at 20  $^{\circ}\text{C}$ .  
495 Then, approximately 150 worms at early adulthood stage were transferred on ten fresh OP50-  
496 seeded NGM plates containing 1mM auxin or 0.25% ethanol. Animals were transferred to new  
497 plates every day until the end of reproductive period, after which worms were transferred to  
498 fresh plates every week. For lifespan assays involved degrading DAF-2 throughout the whole  
499 body (Figure 3H), 50  $\mu\text{g}/\text{ml}$  5-fluoro-deoxyuridine (FUdR) was also added into the NGM plates  
500 to prevent its internal egg hatching phenotype from interfering with the lifespan measurement.  
501 In this experiment, worms were transferred to fresh plates every 4 days until death.

502 Live worms were scored every 2 days. A worm was considered as death if it showed no response  
503 to the gentle touch with a platinum wire on head and tail. Worms that had internally hatched  
504 larvae ('bagged') or ruptured vulvae ('exploded') or crawled off the agar surface or became  
505 contaminated were censored from the analysis. Statistical analyses were performed using IBM  
506 SPSS Statistics 20 software. *p* values were calculated using the log-rank (Mantel-Cox) method.

### 507 **DAF-16 nuclear translocation**

508 To analyze DAF-16 nuclear localization, worms were cultured at 20  $^{\circ}\text{C}$  on NGM plates  
509 containing 0.25% ethanol or 1 mM auxin from eggs laid within a 4-hour period and imaged at  
510 the indicated stage in the figure (Figure 4I, day 1 of adulthood; Figure 7D, L2 larval stage;  
511 Figure S8F, L1 larval stage). As soon as worms were removed from incubation, they were  
512 mounted on slides and imaged immediately.

### 513 **Dauer assay**

514 For the dauer assay of N2 and *daf-2(e1370)* worms, 25-30 gravid adults were allowed to lay  
515 eggs for 1 hour on OP50-seeded standard NGM plates at 20 °C. For the dauer assay of intestinal  
516 DAF-2 AID worms, eggs were laid on NGM plates containing 0.25% ethanol or 1 mM auxin.  
517 After picking off the adults, the resulting synchronous population was transferred to 25 °C and  
518 scored dauer formation after 72 hours post hatch.

### 519 **Developmental Assay**

520 We semi-synchronized the worms by allowing 30 gravid adults to lay eggs 2 hours at 20 °C and  
521 then removing out the adult worms. After 64 hours, the developmental state of the worms was  
522 determined.

### 523 **Brood size assay**

524 16 synchronized L4 stage worms were singled on individual NGM plates seeded with OP50.  
525 The animals were transferred to fresh plates every 24 hours for 4-5 days. Worms that crawled  
526 off the plates, bagged or exploded were censored from the analysis. The number of hatched  
527 worms was counted two days later. The *p* values were determined by Student's t-test.

### 528 **TAG measurement**

529 TAG measurement was performed as previously described (Li et al., 2017). Briefly, 8000  
530 synchronized L1 larval worms were placed on each 10 cm OP50-seeded NGM plate with or  
531 without auxin and collected at late L4 stage. One-eighth of worms was taken out to extract total  
532 soluble protein, and the protein concentration was quantified using the BCA Protein Assay Kit  
533 (Pierce). The sample for TAG measurement was homogenized and 20 µg tri-C17:0 TAG (Nu-  
534 Chek) was added as an internal calibration standard, followed by the extraction of total lipid.  
535 TAG was separated from total lipid on a thin-layer chromatography (TLC) plate, then  
536 transmethylated with 2 ml methanol and 50 µl sulfuric acid to prepare fatty acid methyl esters  
537 (FAMES). FAMES were re-dissolved in 2 ml pentane and chromatographed using a GC/MS  
538 instrument (SHIMADZU, QP2010 Ultra) with a DB-23 GC column (Agilent, 122-2332).  
539 FAME peaks were identified according to the fatty acid standards and integrated to calculate  
540 the TAG amount, which was finally normalized by the protein amount.

### 541 **qRT-PCR**

542 Total RNAs were extracted from N2 and *daf-2(e1370)* worms on adult day 1 using TRIzol  
543 (INVITROGEN), followed by using DNase I to remove contaminant DNA. The cDNA was  
544 synthesized by using a reverse transcription kit (TAKARA). qPCR was carried out on an ABI  
545 7500 Fast real-time PCR system using a TAKARA real-time PCR kit (SYBR Premix Ex Taq™  
546 II). mRNA levels of *pmp-3* and *act-1* were used as the internal control.

### 547 **Preparation worm samples for RNA sequencing at the whole worm level**

548 Six AID worm samples of degrading DAF-2 specifically in the intestine, neuron, hypodermis,  
549 muscle, germline, or whole body and one control worm (MQD2428) were prepared for RNA  
550 sequencing with three biological replicates. Synchronized L1 worms were initially cultured on  
551 the standard high-growth (HG) plates supplemented with OP50 for 24 hours at 20 °C to prevent

552 entering the dauer stage, and then transferred onto HG plates containing 1 mM auxin to degrade  
553 the DAF-2 protein in different tissues. Worms were washed with M9 buffer and harvested on  
554 adult day 1.

#### 555 **Isolation of tissue-specific cells from the intestine-specific DAF-2 AID worms by FACS**

556 Synchronized day 1 adult transgenic worms with GFP-labeled neurons, muscle, hypodermis,  
557 or intestine (*rgef-1p::NuGFP*, *myo-3p::NuGFP*, *dpy-7p::NLS::GFP*, and *ges-1p::NuGFP*)  
558 were prepared for cell isolation. Cells were isolated following the procedure described in  
559 (Kaletsky et al., 2016; Kaletsky et al., 2018) with minor modifications. Briefly, worms were  
560 briefly subjected to SDS-DTT treatment, proteolysis, and mechanical disruption. Cell  
561 suspensions were gently passed over a 5 µm syringe filter (Millipore) for neuron cell isolation;  
562 20 µm filter (PluriSelect) for muscle and hypodermal cell isolation. To isolate intestinal cells,  
563 cell suspensions were passed through a 40 µm cell strainer (Falcon) and then spun at 800 x g  
564 for 3 min in a tabletop centrifuge. The filtered cells were diluted in PBS/20% FBS and sorted  
565 using BD FACS Aria II (BD Biosciences). Gates for detection were set by comparison to  
566 MQD2428 (hqKi363[*daf-2::mNeonGreen*]) cell suspensions prepared on the same day from a  
567 population of worms synchronized alongside the experimental samples. Positive fluorescent  
568 events were sorted directly into tubes containing Trizol LS (Invitrogen) for subsequent RNA  
569 extraction.

#### 570 **RNA sequencing and data pre-processing**

571 RNAs were isolated using a standard Trizol/chloroform/isopropanol method, RNA quality and  
572 quantity were assessed using the Agilent 2100 Bioanalyzer RNA Pico chip (Thermo Fisher  
573 Scientific). For whole worm RNA-seq, libraries were prepared using the NEBNext Ultra RNA  
574 library Prep Kit (NEB) according to the manufacturer's instructions, and then sequenced using  
575 an Illumina HiSeq X Ten System in the paired-end mode (2 × 150 bp) through the service  
576 provided by Bionova. To construct RNA-seq libraries of FACS isolated tissue-specific cell  
577 samples, RNAs (200 ~500 pg) were amplified with oligo-dT, then reverse transcribed to cDNA  
578 based on polyA tail. The template was switched to the 5' end of the RNA and the full-length  
579 cDNA was generated by PCR. Purified cDNA was fragmented into small pieces with fragment  
580 buffer by PCR, and the product was purified and selected by the Agencourt AMPure XP-  
581 Medium kit (Thermo Fisher Scientific). cDNA was quantified by Agilent Technologies 2100  
582 bioanalyzer. The double stranded PCR product undergo QC step was heat denatured and  
583 circularized by the splint oligo sequence. The single strand circle DNA (ssCir DNA) was  
584 formatted as the final library. The final library was amplified with phi29 (Thermo Fisher  
585 Scientific) to make DNA nanoball (DNB) which had more than 300 copies of one molecular,  
586 DNBs were loaded into the patterned nanoarray and single end 100 bases reads were generated  
587 on BGISEQ500 platform (BGI-Shenzhen, China).

588 FASTQC (version 0.10.1) was used to inspect the quality of the raw sequencing data. The raw  
589 data were filtered to remove primers, contamination, and low-quality reads, then the Illumina  
590 adapter sequences were trimmed to obtain the clean sequencing data. The reads were aligned  
591 to the *C. elegans* reference genome (wbcel235.97) using HISAT2 (version 2.1.0) (Kim et al.,  
592 2015) with Ensembl gene annotations (using default parameters). Mapped reads that overlap  
593 with coding gene features were counted using featureCounts (version 1.6.5) (Liao et al., 2014).

594 The total number of mapped clean reads for each library ranged from 25-35 million.

#### 595 **Differential expression (DE) analysis**

596 For the whole worm RNA-seq data, The R package DESeq2 (version 1.24.0) (Love et al., 2014)  
597 was used for data normalization and differential expression analysis. Data quality was assessed  
598 by hierarchical clustering of samples and principal component analysis (PCA). Differentially  
599 expressed genes between auxin treatment and control samples were determined using the *deseq*  
600 function which is based on the Negative Binomial (Gamma-Poisson) distribution. For the  
601 tissue-specific RNA-seq data, the R package edgeR (version 3.26.8) (McCarthy et al., 2012)  
602 was used for multidimensional scaling (MDS), PCA and differential expression analysis. Four  
603 outliers (rep 5 of neuron cell control sample, rep 1 of intestine cell auxin treatment sample, rep  
604 1 of hypodermis cell control sample, and rep 2 of muscle cell auxin treatment sample) were  
605 removed from further analysis. Differentially expressed genes between auxin treatment and  
606 control samples were determined using the *glmQLFit* function (using the parameter  
607 “robust=TRUE”) which is based on the quasi-likelihood (QL) F-test.

#### 608 **Gene Ontology (GO) and KEGG pathway enrichment analysis**

609 The R package gage was used to identify enrichment of GO terms and KEGG pathways which  
610 are based on a Generally Applicable Gene-set Enrichment (GAGE) method (version 2.34.0)  
611 (Luo et al., 2009). The package clusterProfiler (version 3.12.0; (Yu et al., 2012)) was used to  
612 analyze the over-represented GO terms within up- and down-regulated gene. GO term or KEGG  
613 pathway with an adjusted *p*-value <0.01 was defined as significantly changed unless otherwise  
614 noted. Data visualization was performed using the R package ggplot2 (version 3.3.2; Wickham  
615 H (2016)).

#### 616 **TF binding motif analysis**

617 1.0 kb promoter regions upstream of the DE genes from tissue-specific RNA-seq data were  
618 retrieved online from WormBase using the Parasite Biomart tool. The motif matrices were  
619 identified using RSAtools (van Helden et al., 1998), and then analyzed using footprintDB  
620 (Sebastian and Contreras-Moreira, 2014) to identify the potential transcription factors  
621 predicted to bind to similar DNA motifs.

#### 622 **Quantification and statistical analysis**

623 Statistical analyses of lifespan assays were performed via the IBM SPSS Statistics 20 software.  
624 Detailed description of tests performed to determine statistical significance is included in figure  
625 legends. \*, *p* < 0.05; \*\*, *p* < 0.01; \*\*\*, *p* < 0.001; \*\*\*\*, *p* < 0.0001; ns, *p* > 0.05.

#### 626 **Acknowledgments**

627 We thank the Caenorhabditis Genetics Center (CGC), which is supported by the NIH Office of  
628 Infrastructure Programs (P40 OD010440), for providing worm strains. We also thank Drs.  
629 Guang-Shuo Ou and Xiao Liu for providing us worm strains and plasmids. This work was  
630 supported by Ministry of Science and Technology of China (2014CB84980001 to M.-Q.D.),  
631 Beijing Municipal Science and Technology Commission (a fund for cultivation and



632 development of innovation base), and National Natural Science Foundation of China (NSFC-  
633 ISF 30261143020 to M.-Q.D.).

#### 634 **Author contributions**

635 Y.-P.Z., W.-H.Z., and M.-Q.D. designed the experiments and interpreted the data. Y.-P.Z. and  
636 W.-H.Z. performed most of the experiments. P.Z. performed the qRT-PCR experiments and  
637 lifespan assays related to RNA metabolism. Q.L. performed the TAG quantification experiment.  
638 Y.S. performed the 3D imaging experiment. J.-W.W. performed some of the bioinformatics  
639 analysis. S.-B.Z., T.C., and C.Z. involved in the interpretation of some of the data. Y.-P.Z., W.-  
640 H.Z., and M.-Q.D. drafted and revised the manuscript. M.-Q.D. supervised this study.

#### 641 **Declaration of interests**

642 The authors declare no competing interests.

#### **References**

- Aghayeva, U., Bhattacharya, A., Sural, S., Jaeger, E., Churgin, M., Fang-Yen, C., and Hobert, O. (2021). DAF-16/FoxO and DAF-12/VDR control cellular plasticity both cell-autonomously and via interorgan signaling. *PLoS Biol* 19, e3001204, <https://doi.org/10.1371/journal.pbio.3001204>.
- Apfeld, J., and Kenyon, C. (1998). Cell nonautonomy of *C. elegans* daf-2 function in the regulation of diapause and life span. *Cell* 95, 199-210,
- Barbieri, M., Bonafe, M., Franceschi, C., and Paolisso, G. (2003). Insulin/IGF-I-signaling pathway: an evolutionarily conserved mechanism of longevity from yeast to humans. *Am J Physiol Endocrinol Metab* 285, E1064-1071, <https://doi.org/10.1152/ajpendo.00296.2003>.
- Belfiore, A., Malaguarnera, R., Vella, V., Lawrence, M.C., Sciacca, L., Frasca, F., Morrione, A., and Vigneri, R. (2017). Insulin Receptor Isoforms in Physiology and Disease: An Updated View. *Endocr Rev* 38, 379-431, <https://doi.org/10.1210/er.2017-00073>.
- Berman, J.R., and Kenyon, C. (2006). Germ-cell loss extends *C. elegans* life span through regulation of DAF-16 by kri-1 and lipophilic-hormone signaling. *Cell* 124, 1055-1068, <https://doi.org/10.1016/j.cell.2006.01.039>.
- Blucher, M., Kahn, B.B., and Kahn, C.R. (2003). Extended longevity in mice lacking the insulin receptor in adipose tissue. *Science* 299, 572-574, <https://doi.org/10.1126/science.1078223>.
- Boucher, J., Kleinridders, A., and Kahn, C.R. (2014). Insulin receptor signaling in normal and insulin-resistant states. *Cold Spring Harb Perspect Biol* 6, <https://doi.org/10.1101/cshperspect.a009191>.
- Brenner, S. (1974). The genetics of *Caenorhabditis elegans*. *Genetics* 77, 71-94,
- Burkewitz, K., Morantte, I., Weir, H.J.M., Yeo, R., Zhang, Y., Huynh, F.K., Ilkayeva, O.R., Hirschey, M.D., Grant, A.R., and Mair, W.B. (2015). Neuronal CRTG-1 governs systemic mitochondrial metabolism and lifespan via a catecholamine signal. *Cell* 160, 842-855, <https://doi.org/10.1016/j.cell.2015.02.004>.
- Chatterjee, N., and Perrimon, N. (2021). What fuels the fly: Energy metabolism in *Drosophila* and its application to the study of obesity and diabetes. *Sci Adv* 7, <https://doi.org/10.1126/sciadv.abg4336>.
- Clancy, D.J., Gems, D., Harshman, L.G., Oldham, S., Stocker, H., Hafen, E., Leivers, S.J., and Partridge, L. (2001). Extension of life-span by loss of CHICO, a *Drosophila* insulin receptor substrate protein. *Science* 292, 104-106, <https://doi.org/10.1126/science.1057991>.
- Cohen, E., Paulsson, J.F., Blinder, P., Burstyn-Cohen, T., Du, D., Estepa, G., Adame, A., Pham, H.M.,

- Holzenberger, M., Kelly, J.W., *et al.* (2009). Reduced IGF-1 signaling delays age-associated proteotoxicity in mice. *Cell* *139*, 1157-1169, <https://doi.org/10.1016/j.cell.2009.11.014>.
- Czech, M.P. (2017). Insulin action and resistance in obesity and type 2 diabetes. *Nat Med* *23*, 804-814, <https://doi.org/10.1038/nm.4350>.
- Depuydt, G., Xie, F., Petyuk, V.A., Shanmugam, N., Smolders, A., Dhondt, I., Brewer, H.M., Camp, D.G., 2nd, Smith, R.D., and Braeckman, B.P. (2013). Reduced insulin/insulin-like growth factor-1 signaling and dietary restriction inhibit translation but preserve muscle mass in *Caenorhabditis elegans*. *Mol Cell Proteomics* *12*, 3624-3639, <https://doi.org/10.1074/mcp.M113.027383>.
- Dickinson, D.J., Ward, J.D., Reiner, D.J., and Goldstein, B. (2013). Engineering the *Caenorhabditis elegans* genome using Cas9-triggered homologous recombination. *Nat Methods* *10*, 1028-1034, <https://doi.org/10.1038/nmeth.2641>.
- Dillin, A., Crawford, D.K., and Kenyon, C. (2002). Timing requirements for insulin/IGF-1 signaling in *C. elegans*. *Science* *298*, 830-834, <https://doi.org/10.1126/science.1074240>.
- Douglas, P.M., Baird, N.A., Simic, M.S., Uhlein, S., McCormick, M.A., Wolff, S.C., Kennedy, B.K., and Dillin, A. (2015). Heterotypic Signals from Neural HSF-1 Separate Thermotolerance from Longevity. *Cell Rep* *12*, 1196-1204, <https://doi.org/10.1016/j.celrep.2015.07.026>.
- Durieux, J., Wolff, S., and Dillin, A. (2011). The cell-non-autonomous nature of electron transport chain-mediated longevity. *Cell* *144*, 79-91, <https://doi.org/10.1016/j.cell.2010.12.016>.
- El-Ami, T., Moll, L., Carvalhal Marques, F., Volovik, Y., Reuveni, H., and Cohen, E. (2014). A novel inhibitor of the insulin/IGF signaling pathway protects from age-onset, neurodegeneration-linked proteotoxicity. *Aging Cell* *13*, 165-174, <https://doi.org/10.1111/acer.12171>.
- Fraser, A.G., Kamath, R.S., Zipperlen, P., Martinez-Campos, M., Sohrmann, M., and Ahringer, J. (2000). Functional genomic analysis of *C. elegans* chromosome I by systematic RNA interference. *Nature* *408*, 325-330, <https://doi.org/10.1038/35042517>.
- Friedman, D.B., and Johnson, T.E. (1988). A mutation in the *age-1* gene in *Caenorhabditis elegans* lengthens life and reduces hermaphrodite fertility. *Genetics* *118*, 75-86,
- Gems, D., Sutton, A.J., Sundermeyer, M.L., Albert, P.S., King, K.V., Edgley, M.L., Larsen, P.L., and Riddle, D.L. (1998). Two pleiotropic classes of *daf-2* mutation affect larval arrest, adult behavior, reproduction and longevity in *Caenorhabditis elegans*. *Genetics* *150*, 129-155,
- Guarente, L., and Kenyon, C. (2000). Genetic pathways that regulate ageing in model organisms. *Nature* *408*, 255-262, <https://doi.org/10.1038/35041700>.
- Hasler, D., Meduri, R., Bak, M., Lehmann, G., Heizinger, L., Wang, X., Li, Z.T., Sement, F.M., Bruckmann, A., Dock-Bregeon, A.C., *et al.* (2020). The Alzami Syndrome-Associated Protein LARP7 Guides U6 Small Nuclear RNA Modification and Contributes to Splicing Robustness. *Mol Cell* *77*, 1014-1031 e1013, <https://doi.org/10.1016/j.molcel.2020.01.001>.
- Henderson, S.T., and Johnson, T.E. (2001). *daf-16* integrates developmental and environmental inputs to mediate aging in the nematode *Caenorhabditis elegans*. *Curr Biol* *11*, 1975-1980,
- Holzenberger, M., Dupont, J., Ducos, B., Leneuve, P., Geloën, A., Even, P.C., Cervera, P., and Le Bouc, Y. (2003). IGF-1 receptor regulates lifespan and resistance to oxidative stress in mice. *Nature* *421*, 182-187, <https://doi.org/10.1038/nature01298>.
- Honnen, S.J., Buchter, C., Schroder, V., Hoffmann, M., Kohara, Y., Kampkotter, A., and Bossinger, O. (2012). *C. elegans* VANG-1 modulates life span via insulin/IGF-1-like signaling. *PLoS One* *7*, e32183, <https://doi.org/10.1371/journal.pone.0032183>.
- Imanikia, S., Ozbey, N.P., Krueger, C., Casanueva, M.O., and Taylor, R.C. (2019). Neuronal XBP-1 Activates

Intestinal Lysosomes to Improve Proteostasis in *C. elegans*. *Curr Biol* 29, 2322-2338 e2327, <https://doi.org/10.1016/j.cub.2019.06.031>.

Iyer-Bierhoff, A., Krogh, N., Tessarz, P., Ruppert, T., Nielsen, H., and Grummt, I. (2018). SIRT7-Dependent Deacetylation of Fibrillarin Controls Histone H2A Methylation and rRNA Synthesis during the Cell Cycle. *Cell Rep* 25, 2946-2954 e2945, <https://doi.org/10.1016/j.celrep.2018.11.051>.

Kaletsky, R., Lakhina, V., Arey, R., Williams, A., Landis, J., Ashraf, J., and Murphy, C.T. (2016). The *C. elegans* adult neuronal IIS/FOXO transcriptome reveals adult phenotype regulators. *Nature* 529, 92-96, <https://doi.org/10.1038/nature16483>.

Kaletsky, R., Yao, V., Williams, A., Runnels, A.M., Tadych, A., Zhou, S., Troyanskaya, O.G., and Murphy, C.T. (2018). Transcriptome analysis of adult *Caenorhabditis elegans* cells reveals tissue-specific gene and isoform expression. *PLoS Genet* 14, e1007559, <https://doi.org/10.1371/journal.pgen.1007559>.

Kamath, R.S., Martinez-Campos, M., Zipperlen, P., Fraser, A.G., and Ahringer, J. (2001). Effectiveness of specific RNA-mediated interference through ingested double-stranded RNA in *Caenorhabditis elegans*. *Genome Biol* 2, RESEARCH0002, <https://doi.org/10.1186/gb-2000-2-1-research0002>.

Kapahi, P. (2010). Protein synthesis and the antagonistic pleiotropy hypothesis of aging. *Adv Exp Med Biol* 694, 30-37, [https://doi.org/10.1007/978-1-4419-7002-2\\_3](https://doi.org/10.1007/978-1-4419-7002-2_3).

Kenyon, C. (2001). A conserved regulatory system for aging. *Cell* 105, 165-168,

Kenyon, C. (2011). The first long-lived mutants: discovery of the insulin/IGF-1 pathway for ageing. *Philos Trans R Soc Lond B Biol Sci* 366, 9-16, <https://doi.org/10.1098/rstb.2010.0276>.

Kenyon, C., Chang, J., Gensch, E., Rudner, A., and Tabtiang, R. (1993). A *C. elegans* mutant that lives twice as long as wild type. *Nature* 366, 461-464, <https://doi.org/10.1038/366461a0>.

Kenyon, C.J. (2010). The genetics of ageing. *Nature* 464, 504-512, <https://doi.org/10.1038/nature08980>.

Kim, D., Langmead, B., and Salzberg, S.L. (2015). HISAT: a fast spliced aligner with low memory requirements. *Nat Methods* 12, 357-360, <https://doi.org/10.1038/nmeth.3317>.

Kimura, K.D., Riddle, D.L., and Ruvkun, G. (2011). The *C. elegans* DAF-2 insulin-like receptor is abundantly expressed in the nervous system and regulated by nutritional status. *assignment* 76, 113-120, <https://doi.org/10.1101/sqb.2011.76.010660>.

Kimura, K.D., Tissenbaum, H.A., Liu, Y., and Ruvkun, G. (1997). *daf-2*, an insulin receptor-like gene that regulates longevity and diapause in *Caenorhabditis elegans*. *Science* 277, 942-946,

Kwon, E.S., Narasimhan, S.D., Yen, K., and Tissenbaum, H.A. (2010). A new DAF-16 isoform regulates longevity. *Nature* 466, 498-502, <https://doi.org/10.1038/nature09184>.

Lan, J., Rollins, J.A., Zang, X., Wu, D., Zou, L., Wang, Z., Ye, C., Wu, Z., Kapahi, P., Rogers, A.N., *et al.* (2019). Translational Regulation of Non-autonomous Mitochondrial Stress Response Promotes Longevity. *Cell Rep* 28, 1050-1062 e1056, <https://doi.org/10.1016/j.celrep.2019.06.078>.

Lee, R.Y., Hench, J., and Ruvkun, G. (2001). Regulation of *C. elegans* DAF-16 and its human ortholog FKHL1 by the *daf-2* insulin-like signaling pathway. *Curr Biol* 11, 1950-1957,

Li, S., Li, Q., Kong, Y., Wu, S., Cui, Q., Zhang, M., and Zhang, S.O. (2017). Specific regulation of thermosensitive lipid droplet fusion by a nuclear hormone receptor pathway. *Proc Natl Acad Sci U S A* 114, 8841-8846, <https://doi.org/10.1073/pnas.1704277114>.

Li, W.-J., Wang, C.-W., Tao, L., Yan, Y.-H., Zhang, M.-J., Liu, Z.-X., Li, Y.-X., Zhao, H.-Q., Li, X.-M., He, X.-D., *et al.* (2021). Insulin signaling regulates longevity through protein phosphorylation in *Caenorhabditis elegans*. *Nature Communications* 12, 4568, <https://doi.org/10.1038/s41467-021-24816-z>.

Liao, Y., Smyth, G.K., and Shi, W. (2014). featureCounts: an efficient general purpose program for assigning sequence reads to genomic features. *Bioinformatics* 30, 923-930,

<https://doi.org/10.1093/bioinformatics/btt656>.

Libina, N., Berman, J.R., and Kenyon, C. (2003). Tissue-specific activities of *C. elegans* DAF-16 in the regulation of lifespan. *Cell* 115, 489-502,

Lin, K., Dorman, J.B., Rodan, A., and Kenyon, C. (1997). *daf-16*: An HNF-3/forkhead family member that can function to double the life-span of *Caenorhabditis elegans*. *Science* 278, 1319-1322,

Lin, K., Hsin, H., Libina, N., and Kenyon, C. (2001). Regulation of the *Caenorhabditis elegans* longevity protein DAF-16 by insulin/IGF-1 and germline signaling. *Nat Genet* 28, 139-145, <https://doi.org/10.1038/88850>.

Love, M.I., Huber, W., and Anders, S. (2014). Moderated estimation of fold change and dispersion for RNA-seq data with DESeq2. *Genome Biol* 15, 550, <https://doi.org/10.1186/s13059-014-0550-8>.

Luo, W., Friedman, M.S., Shedden, K., Hankenson, K.D., and Woolf, P.J. (2009). GAGE: generally applicable gene set enrichment for pathway analysis. *BMC Bioinformatics* 10, 161, <https://doi.org/10.1186/1471-2105-10-161>.

Marmier-Gourrier, N., Clery, A., Senty-Segault, V., Charpentier, B., Schlotter, F., Leclerc, F., Fournier, R., and Branlant, C. (2003). A structural, phylogenetic, and functional study of 15.5-kD/Snu13 protein binding on U3 small nucleolar RNA. *RNA* 9, 821-838, <https://doi.org/10.1261/rna.2130503>.

McCarthy, D.J., Chen, Y., and Smyth, G.K. (2012). Differential expression analysis of multifactor RNA-Seq experiments with respect to biological variation. *Nucleic Acids Res* 40, 4288-4297, <https://doi.org/10.1093/nar/gks042>.

Morris, J.Z., Tissenbaum, H.A., and Ruvkun, G. (1996). A phosphatidylinositol-3-OH kinase family member regulating longevity and diapause in *Caenorhabditis elegans*. *Nature* 382, 536-539, <https://doi.org/10.1038/382536a0>.

Nakdimon, I., Walser, M., Frohli, E., and Hajnal, A. (2012). PTEN negatively regulates MAPK signaling during *Caenorhabditis elegans* vulval development. *PLoS Genet* 8, e1002881, <https://doi.org/10.1371/journal.pgen.1002881>.

Narasimhan, S.D., Yen, K., and Tissenbaum, H.A. (2009). Converging pathways in lifespan regulation. *Curr Biol* 19, R657-666, <https://doi.org/10.1016/j.cub.2009.06.013>.

Ogg, S., Paradis, S., Gottlieb, S., Patterson, G.I., Lee, L., Tissenbaum, H.A., and Ruvkun, G. (1997). The Fork head transcription factor DAF-16 transduces insulin-like metabolic and longevity signals in *C. elegans*. *Nature* 389, 994-999, <https://doi.org/10.1038/40194>.

Pan, K.Z., Palter, J.E., Rogers, A.N., Olsen, A., Chen, D., Lithgow, G.J., and Kapahi, P. (2007). Inhibition of mRNA translation extends lifespan in *Caenorhabditis elegans*. *Aging Cell* 6, 111-119, <https://doi.org/10.1111/j.1474-9726.2006.00266.x>.

Paradis, S., and Ruvkun, G. (1998). *Caenorhabditis elegans* Akt/PKB transduces insulin receptor-like signals from AGE-1 PI3 kinase to the DAF-16 transcription factor. *Genes Dev* 12, 2488-2498,

Pawlikowska, L., Hu, D., Huntsman, S., Sung, A., Chu, C., Chen, J., Joyner, A.H., Schork, N.J., Hsueh, W.C., Reiner, A.P., *et al.* (2009). Association of common genetic variation in the insulin/IGF1 signaling pathway with human longevity. *Aging Cell* 8, 460-472, <https://doi.org/10.1111/j.1474-9726.2009.00493.x>.

Pierce, S.B., Costa, M., Wisotzkey, R., Devadhar, S., Homburger, S.A., Buchman, A.R., Ferguson, K.C., Heller, J., Platt, D.M., Pasquinelli, A.A., *et al.* (2001). Regulation of DAF-2 receptor signaling by human insulin and *ins-1*, a member of the unusually large and diverse *C. elegans* insulin gene family. *Genes Dev* 15, 672-686, <https://doi.org/10.1101/gad.867301>.

Piper, M.D., Selman, C., McElwee, J.J., and Partridge, L. (2008). Separating cause from effect: how does insulin/IGF signalling control lifespan in worms, flies and mice? *J Intern Med* 263, 179-191,

<https://doi.org/10.1111/j.1365-2796.2007.01906.x>.

Plamper, M., Gohlke, B., Schreiner, F., and Woelfle, J. (2018). Mecasermin in Insulin Receptor-Related Severe Insulin Resistance Syndromes: Case Report and Review of the Literature. *Int J Mol Sci* *19*, <https://doi.org/10.3390/ijms19051268>.

Rera, M., Azizi, M.J., and Walker, D.W. (2013). Organ-specific mediation of lifespan extension: more than a gut feeling? *Ageing Res Rev* *12*, 436-444, <https://doi.org/10.1016/j.arr.2012.05.003>.

Saltiel, A.R., and Kahn, C.R. (2001). Insulin signalling and the regulation of glucose and lipid metabolism. *Nature* *414*, 799-806, <https://doi.org/10.1038/414799a>.

Sebastian, A., and Contreras-Moreira, B. (2014). footprintDB: a database of transcription factors with annotated cis elements and binding interfaces. *Bioinformatics* *30*, 258-265, <https://doi.org/10.1093/bioinformatics/btt663>.

Shaner, N.C., Lambert, G.G., Chammas, A., Ni, Y., Cranfill, P.J., Baird, M.A., Sell, B.R., Allen, J.R., Day, R.N., Israelsson, M., *et al.* (2013). A bright monomeric green fluorescent protein derived from Branchiostoma lanceolatum. *Nat Methods* *10*, 407-409, <https://doi.org/10.1038/nmeth.2413>.

Stout, G.J., Stigter, E.C., Essers, P.B., Mulder, K.W., Kolkman, A., Snijders, D.S., van den Broek, N.J., Betist, M.C., Korswagen, H.C., Macinnes, A.W., *et al.* (2013). Insulin/IGF-1-mediated longevity is marked by reduced protein metabolism. *Mol Syst Biol* *9*, 679, <https://doi.org/10.1038/msb.2013.35>.

Suh, Y., Atzmon, G., Cho, M.O., Hwang, D., Liu, B., Leahy, D.J., Barzilai, N., and Cohen, P. (2008). Functionally significant insulin-like growth factor I receptor mutations in centenarians. *Proc Natl Acad Sci U S A* *105*, 3438-3442, <https://doi.org/10.1073/pnas.0705467105>.

Syntichaki, P., Troulinaki, K., and Tavernarakis, N. (2007). Protein synthesis is a novel determinant of aging in *Caenorhabditis elegans*. *Ann N Y Acad Sci* *1119*, 289-295, <https://doi.org/10.1196/annals.1404.001>.

Tatar, M., Kopelman, A., Epstein, D., Tu, M.P., Yin, C.M., and Garofalo, R.S. (2001). A mutant *Drosophila* insulin receptor homolog that extends life-span and impairs neuroendocrine function. *Science* *292*, 107-110, <https://doi.org/10.1126/science.1057987>.

Tepper, R.G., Ashraf, J., Kaletsky, R., Kleemann, G., Murphy, C.T., and Bussemaker, H.J. (2013). PQM-1 complements DAF-16 as a key transcriptional regulator of DAF-2-mediated development and longevity. *Cell* *154*, 676-690, <https://doi.org/10.1016/j.cell.2013.07.006>.

Tiku, V., Jain, C., Raz, Y., Nakamura, S., Heestand, B., Liu, W., Spath, M., Suchiman, H.E.D., Muller, R.U., Slagboom, P.E., *et al.* (2017). Small nucleoli are a cellular hallmark of longevity. *Nat Commun* *8*, 16083, <https://doi.org/10.1038/ncomms16083>.

Tiku, V., Kew, C., Mehrotra, P., Ganesan, R., Robinson, N., and Antebi, A. (2018). Nucleolar fibrillarin is an evolutionarily conserved regulator of bacterial pathogen resistance. *Nat Commun* *9*, 3607, <https://doi.org/10.1038/s41467-018-06051-1>.

Titchenell, P.M., Lazar, M.A., and Birnbaum, M.J. (2017). Unraveling the Regulation of Hepatic Metabolism by Insulin. *Trends Endocrinol Metab* *28*, 497-505, <https://doi.org/10.1016/j.tem.2017.03.003>.

Tullet, J.M., Hertweck, M., An, J.H., Baker, J., Hwang, J.Y., Liu, S., Oliveira, R.P., Baumeister, R., and Blackwell, T.K. (2008). Direct inhibition of the longevity-promoting factor SKN-1 by insulin-like signaling in *C. elegans*. *Cell* *132*, 1025-1038, <https://doi.org/10.1016/j.cell.2008.01.030>.

Uno, M., Tani, Y., Nono, M., Okabe, E., Kishimoto, S., Takahashi, C., Abe, R., Kurihara, T., and Nishida, E. (2021). Neuronal DAF-16-to-intestinal DAF-16 communication underlies organismal lifespan extension in *C. elegans*. *iScience* *24*, 102706, <https://doi.org/10.1016/j.isci.2021.102706>.

- Ussar, S., Haering, M.F., Fujisaka, S., Lutter, D., Lee, K.Y., Li, N., Gerber, G.K., Bry, L., and Kahn, C.R. (2017). Regulation of Glucose Uptake and Enteroendocrine Function by the Intestinal Epithelial Insulin Receptor. *Diabetes* 66, 886-896, <https://doi.org/10.2337/db15-1349>.
- van Helden, J., Andre, B., and Collado-Vides, J. (1998). Extracting regulatory sites from the upstream region of yeast genes by computational analysis of oligonucleotide frequencies. *J Mol Biol* 281, 827-842, <https://doi.org/10.1006/jmbi.1998.1947>.
- Wang, S., Tang, N.H., Lara-Gonzalez, P., Zhao, Z., Cheerambathur, D.K., Prevo, B., Chisholm, A.D., Desai, A., and Oegema, K. (2017). A toolkit for GFP-mediated tissue-specific protein degradation in *C. elegans*. *Development* 144, 2694-2701, <https://doi.org/10.1242/dev.150094>.
- Willcox, B.J., Donlon, T.A., He, Q., Chen, R., Grove, J.S., Yano, K., Masaki, K.H., Willcox, D.C., Rodriguez, B., and Curb, J.D. (2008). FOXO3A genotype is strongly associated with human longevity. *Proc Natl Acad Sci U S A* 105, 13987-13992, <https://doi.org/10.1073/pnas.0801030105>.
- Wolkow, C.A., Kimura, K.D., Lee, M.S., and Ruvkun, G. (2000). Regulation of *C. elegans* life-span by insulinlike signaling in the nervous system. *Science* 290, 147-150.
- Yu, G., Wang, L.G., Han, Y., and He, Q.Y. (2012). clusterProfiler: an R package for comparing biological themes among gene clusters. *OMICS* 16, 284-287, <https://doi.org/10.1089/omi.2011.0118>.
- Zhang, B., Gong, J., Zhang, W., Xiao, R., Liu, J., and Xu, X.Z.S. (2018a). Brain-gut communications via distinct neuroendocrine signals bidirectionally regulate longevity in *C. elegans*. *Genes Dev* 32, 258-270, <https://doi.org/10.1101/gad.309625.117>.
- Zhang, J., and Liu, F. (2014). Tissue-specific insulin signaling in the regulation of metabolism and aging. *IUBMB Life* 66, 485-495, <https://doi.org/10.1002/iub.1293>.
- Zhang, L., Ward, J.D., Cheng, Z., and Dernburg, A.F. (2015). The auxin-inducible degradation (AID) system enables versatile conditional protein depletion in *C. elegans*. *Development* 142, 4374-4384, <https://doi.org/10.1242/dev.129635>.
- Zhang, Q., Wu, X., Chen, P., Liu, L., Xin, N., Tian, Y., and Dillin, A. (2018b). The Mitochondrial Unfolded Protein Response Is Mediated Cell-Non-autonomously by Retromer-Dependent Wnt Signaling. *Cell* 174, 870-883 e817, <https://doi.org/10.1016/j.cell.2018.06.029>.

## Supporting information

### Figure S1. Knocking in *daf-16::gfp* or *daf-2::mNeonGreen* does not affect lifespan or development. Related to Figure 1 and 2.

(A) The lifespan of *daf-16::gfp* knock-in worms or *daf-2::mNeonGreen* knock-in worms is comparable to that of WT animals.

(B) *daf-16::gfp* does not affect the Daf-c phenotype of *daf-2(e1370)* mutant at 25 °C, and *daf-2::mNeonGreen* knock-in does not induce dauer formation at 25 °C. Data shown are one of three biological replicates.

### Figure S2. The spatiotemporal expression pattern of *daf-2p::NuGFP*. Related to Figure 1.

(A) DAF-2::mNeonGreen is co-expressed with ciliated sensory neuron maker *osm-6p::mCherry*.  
(B-G) NuGFP reporter shows the expression pattern of *daf-2* at the two-cell embryonic stage (B), embryonic stage (C), L1 larval stage (D), L2 larval stage (E), L3 larval stage (F), and L4 larval stage (G).

**Figure S3. The spatiotemporal expression pattern of DAF-16::GFP. Related to Figure 2.**

The expression pattern of DAF-16::GFP at embryonic stages (A), L1 larval stage (B), L2 larval stage (C), L3 larval stage (D), and L4 larval stage (E).

**Figure S4. Tissue-specific degradation of DAF-2::degron::mNeonGreen by the AID system. Related to Figure 3.**

(A) Schematic of the AID system. One key component of the AID system is a plant-specific F-box protein called transport inhibitor response 1 (TIR1), which is expressed under the control of a tissue-specific promoter to achieve spatial specificity. The other key component, an auxin-inducible degron sequence from the IAA17 protein, is fused to the protein of interest. Once bound to the plant hormone, auxin, TIR1 targets degron-tagged proteins for ubiquitin-dependent proteasomal degradation. The *C. elegans* AID system employs the *Arabidopsis thaliana* TIR1 and a 44-amino acid minimal degron sequence.

(B) Schematic of construction of tissue-specific AID worms by CRISPR/Cas9 genomic editing. The *eft-3* promoter is replaced with neuron-specific, hypodermis-specific, body wall muscle-specific, or gonadal sheath-specific promoter on chromosome II. The *sun-1* promoter and *sun-1* 3'UTR are replaced with XXX cells-specific promoter and *unc-54* 3'UTR, respectively, on chromosome IV.

(C-J) Specifically degrading DAF-2 in the neurons (C), intestine (D), body wall muscles (E), hypodermis (F), germline (G), gonadal sheath (H), XXX cells (I), or whole body (J) with 1 mM auxin treatment.

**Figure S5. Tissue-specific degradation of DAF-16::GFP::degron in *daf-2(e1370)* worms by the AID system. Related to Figure 4.**

(A-H) Specifically degrading DAF-16::GFP::degron in the neurons (A), intestine (B), body wall muscles (C), hypodermis (D), germline (E), gonadal sheath (F), XXX cells (G), or whole body (H) with 1 mM auxin treatment.

**Figure S6. Transcriptome analysis of tissue-specific DAF-2 AID worms. Related to Figure 6.**

(A) Principal component analysis (PCA) shows that samples cluster with their respective genotypes. R1, R2, and R3 represent three biological replicates.

(B-F) Overlap of DEGs in the whole body DAF-2 AID worms and that in the intestinal DAF-2 AID worms. (B), hypodermal DAF-2 AID worms (C), neuronal DAF-2 AID worms (D), germline DAF-2 AID worms (E), or body wall muscle DAF-2 AID worms (F). DEGs were defined as adjusted *p*-value < 0.001.

**Figure S7. KEGG enrichment of tissue-specific DAF-2 AID worms by the GSEA analysis. Related to Figure 6.**

(A) KEGG pathways enriched in each tissue-specific DAF-2 AID worm. Pathways with *q*-value < 0.05 are shown.

(B) Knocking down of *M28.5* does not affect WT lifespan.

**Figure S8. Tissue-specific transcriptome analysis of the intestinal DAF-2 AID worm. Related to Figure 7.**

- (A) Workflow of tissue-specific cell isolation by FACS.
- (B) Sample information of isolated cells for tissue-specific RNA-seq.
- (C) PCA analysis shows that samples cluster with their respective tissue types as well as corresponding treatment (ethanol versus auxin).
- (D) Numbers of DEGs (FDR < 0.05) identified in each isolated tissue in the intestinal DAF-2 AID worms.
- (E) Moderate enrichments of Class I and Class II DAF-16 targets are found among the hypodermal and neuronal DEGs upon degrading DAF-2 in the intestine. *p*-values are calculated using a hypergeometric test.
- (F) Degrading DAF-2 from the intestine induces DAF-16 nuclear accumulation in the hypodermis at the L1 larval stage.
- (G-H) Representative images showing that intestinal DAF-2 degradation regulates the expression of classical Class I DAF-16 targets *mtl-1p::mCherry* (G) and *dod-3p::mCherry* (H) in the same tissue.

**Table S1. Statistical analyses of lifespan experiments (related to Figure 3, 4, 6 and 7)**

**Table S2. Strains used in this study.**

**Table S3. Oligonucleotide sequences used in this study.**



## Figure Legend

### Figure 1. Endogenous expression of the *daf-2* gene detected in most or all *C. elegans* cells from embryos to adults.

(A) Schematic of two strategies to characterize the endogenous expression pattern of *daf-2*. The coding sequence of the mNeonGreen, mNeonGreen::degron (top panel), or NuGFP cassette (bottom panel) is knocked into the *daf-2* genomic locus before the stop codon by CRISPR/Cas9 genome editing, which allows detection of *daf-2* expression at the protein level or at the mRNA level, respectively. Blue boxes, coding regions; line, non-coding regions; grey boxes, 3' untranslated regions.

(B) Expression pattern of *daf-2* at the protein level indicated by the DAF-2::mNeonGreen at day 1 of adulthood.

(C) Expression pattern of *daf-2* at the mRNA level indicated by the NuGFP reporter at day 1 of adulthood. Left panel, overview of the expression of *daf-2* mRNA throughout the whole body. H.N, head neuron; G, germ line, indicated by the circled red dotted line; In, intestine, indicated by short arrows; V, vulval cells, indicated by long arrow; E, embryo, indicated by the circled grey dashed line; H, hypodermal cells, indicated by triangles; T.N, tail neuron, indicated by the circled white dotted line; M, body wall muscle, indicated by asterisks. Right panel, local expression patterns of *daf-2* mRNA. *osm-6p::mCherry*, ciliated sensory neuron marker; *eak-4p::NLS::mCherry*, XXX cells-specific marker; *myo-3p::H1::mCherry*, body wall muscle-specific marker; *lim-7p::NLS::mCherry*, gonadal sheath-specific marker.

(D) Summary of the spatiotemporal expression pattern of NuGFP reporter. +, expression intensity of NuGFP; -, expression of NuGFP is not detectable.

See also Figures S1 and S2.

### Figure 2. Ubiquitous presence of DAF-16 detected in the *C. elegans* soma and germline.

(A) Schematic of knocking in the coding sequence of GFP or GFP::degron into the *daf-16* genomic locus before the stop codon using CRISPR/Cas9 genome editing. Blue boxes, coding regions; line, non-coding regions; grey boxes, 3' untranslated regions.

(B-D) Expression patterns of DAF-16::GFP at day 1 of adulthood (B), embryonic stage (C), and L1 larval stage (D).

(E) Summary of the spatiotemporal expression patterns of DAF-16::GFP. +, expression intensity of DAF-16::GFP; -, expression of DAF-16::GFP is not detectable.

See also Figures S1 and S3.

### Figure 3. Intestine-specific degradation of DAF-2 extended *C. elegans* lifespan by 94.3%.

(A-C) Degrading DAF-2 in the neurons (A), germline (B), and hypodermis (C) increased the lifespan by 18.6% ( $p < 0.0001$ ), 6.4% ( $p < 0.05$ ), and 13.7% ( $p < 0.001$ ), respectively.

(D-F) Degrading DAF-2 in the BWM (D), gonadal sheath (E), or XXX cells (F) had no effect on WT lifespan ( $p > 0.05$ ).

(G) Degrading DAF-2 in the intestine increased WT lifespan by 94.3% ( $p < 0.0001$ ).

(H) Degrading DAF-2 in the whole body increased WT lifespan by 166.5% (green solid line versus green dashed line,  $p < 0.0001$ ), which outlived the canonical hypomorphic *daf-2(e1370)* mutant worms and the intestinal DAF-2 AID worms (grey solid line and red solid line, respectively).

*p*-values are calculated by log-rank tests.

See also Table S1 and Figure S4.

**Figure 4. 90.3% of the lifespan extension induced by *daf-2(e1370)* required intestinal DAF-16.**

(A) Degrading DAF-16 from the neurons shortened the *daf-2(e1370)* lifespan by 15.6% ( $p < 0.0001$ ).

(B) Degrading DAF-16 from the germline had no significant effect on the *daf-2(e1370)* lifespan ( $p > 0.05$ ).

(C) Degrading DAF-16 from the hypodermis shortened the *daf-2(e1370)* lifespan by 15.5% ( $p < 0.0001$ ).

(D-F) Degrading DAF-16 in the BWM (D), gonadal sheath (E), or XXX cells (F) had no effect on the lifespan of *daf-2(e1370)* ( $p > 0.05$ ).

(G) Degrading intestinal DAF-16 shortened the *daf-2(e1370)* lifespan by 40.1% ( $p < 0.0001$ ).

(H) Degrading DAF-16 in all tissues shortened the *daf-2(e1370)* lifespan by 57.8% ( $p < 0.0001$ ).

(I) Endogenously expressed DAF-16::GFP accumulated in the intestinal nuclei upon degrading DAF-2 from the intestine.

(J) Degrading intestinal DAF-16 largely suppressed the longevity induced by degrading DAF-2 from the intestine (red dashed line versus red solid line,  $p < 0.0001$ ).

*p*-values are calculated by log-rank tests.

See also Table S1 and Figure S5.

**Figure 5. Degrading DAF-2 in the intestine hardly affected development and reproduction.**

(A) Intestinal degradation of DAF-2 did not cause dauer arrest at 25 °C.

(B) The intestinal DAF-2 AID worms developed faster than the *daf-2(e1370)* worms. Data are represented as mean  $\pm$  SEM.

(C) The brood size of intestinal DAF-2 AID worms is comparable to that of the control animals.

(D) Degradation of intestinal DAF-2 elevates the triacylglycerol (TAG) content by 2.4-fold relative to the control animals. Data are represented as mean  $\pm$  SEM.

*p*-values are calculated by Student's *t*-test. \*\*\*,  $p < 0.001$ ; \*\*,  $p < 0.01$ ; \*,  $p < 0.05$ ; ns,  $p > 0.05$ .

**Figure 6. Transcriptional changes induced by degrading intestinal DAF-2 featured down-regulation of RNA and protein metabolism.**

(A) Transcriptome analysis of *daf-2(e1370)* versus WT (N2) worms. Left panel, overlap of the canonical DAF-16 targets and DEGs ( $q$ -value  $< 0.05$ ) of *daf-2(e1370)*. Middle panel, enriched KEGG pathways among Class I and Class II DAF-16 targets by Over Representation Analysis (ORA). Only pathways with adjusted  $p$ -value  $< 0.001$  are shown. Right panel, GSEA of *daf-*

*daf-2(e1370)* worms. Pathways with  $q$ -value $<0.01$  are shown, and those related to protein metabolism (red color) and RNA metabolism (orange color) are highlighted.

(B) GSEA analysis of worms subjected to tissue-specific degradation of DAF-2. Pathways with  $q$ -value $<0.01$  in at least one sample are shown, and those related to protein metabolism (red color) and RNA metabolism (orange color) are highlighted.

(C) qRT-PCR analysis of ribosomal RNAs (left panel) as well as their precursors (right panel) in *daf-2(e1370)* and N2 worms. Data are represented as mean  $\pm$  SD.

(D) Knocking down of genes related to RNA metabolism (*fib-1* and *M28.5*) by RNAi further extended the lifespan of *daf-2(e1370)* worms.

See also Table S1, Figure S6 and S7.

**Figure 7. Loss of intestinal DAF-2 triggered gene expression changes in other tissues through cross-tissue DAF-2 to DAF-16 signaling, in part.**

(A) Isolation of neurons, hypodermis, BWM, and intestine from intestinal DAF-2 AID worms for RNA-seq. Left panel, tissue-specific transgenic reporters in the intestinal DAF-2 AID strain used to isolate tissues of interest. Neurons, labeled by *rgef-1p::NuGFP*; hypodermis, labeled by *dpy-7p::NLS::GFP*; muscle, labeled by *myo-3p::NuGFP*; intestine, labeled by *ges-1p::NuGFP*. Right panel, representative images of tissue-specific cells isolated by FACS for RNA-seq.

(B) GSEA analysis of up-regulated and down-regulated GO terms enriched in each isolated tissue. GO terms with  $q$ -value $<0.01$  in at least two tissues are shown.

(C) Five DEGs selected to verify the cross-tissue effect of intestinal IIS on non-intestinal tissues by constructing *mCherry* transgenic reporters in the intestinal DAF-2 AID strain. Representative images of each reporter are shown in the right panel.

(D) Degrading DAF-2 from the intestine induces DAF-16 nuclear accumulation in the hypodermis at the L2 larval stage.

(E) Schematic of the combination of tissue-specific GFP nanobody-mediated ZIF-1 system and tissue-specific AID system to simultaneously degrade DAF-2 and DAF-16 in two different tissues, the intestine and non-intestinal tissues (neurons or hypodermis).

(F) Lifespan phenotypes following simultaneous degradation of intestinal DAF-2 and non-intestinal DAF-16. Degrading intestinal DAF-2 by GFP nanobody-mediated ZIF-1 system extended lifespan by 49.5% (top panel). Degrading DAF-16 in the hypodermis (bottom panel), but not in the neurons (middle panel), moderately but significantly decreased the lifespan of the worms in which the intestinal DAF-2 level was reduced.

(G) Motif enrichment analysis of transcriptional binding sites among 1-kb promoter sequence of the intestinal, hypodermal, and neuronal DEGs.

See also Table S1, Figure S8.

## Figure 1

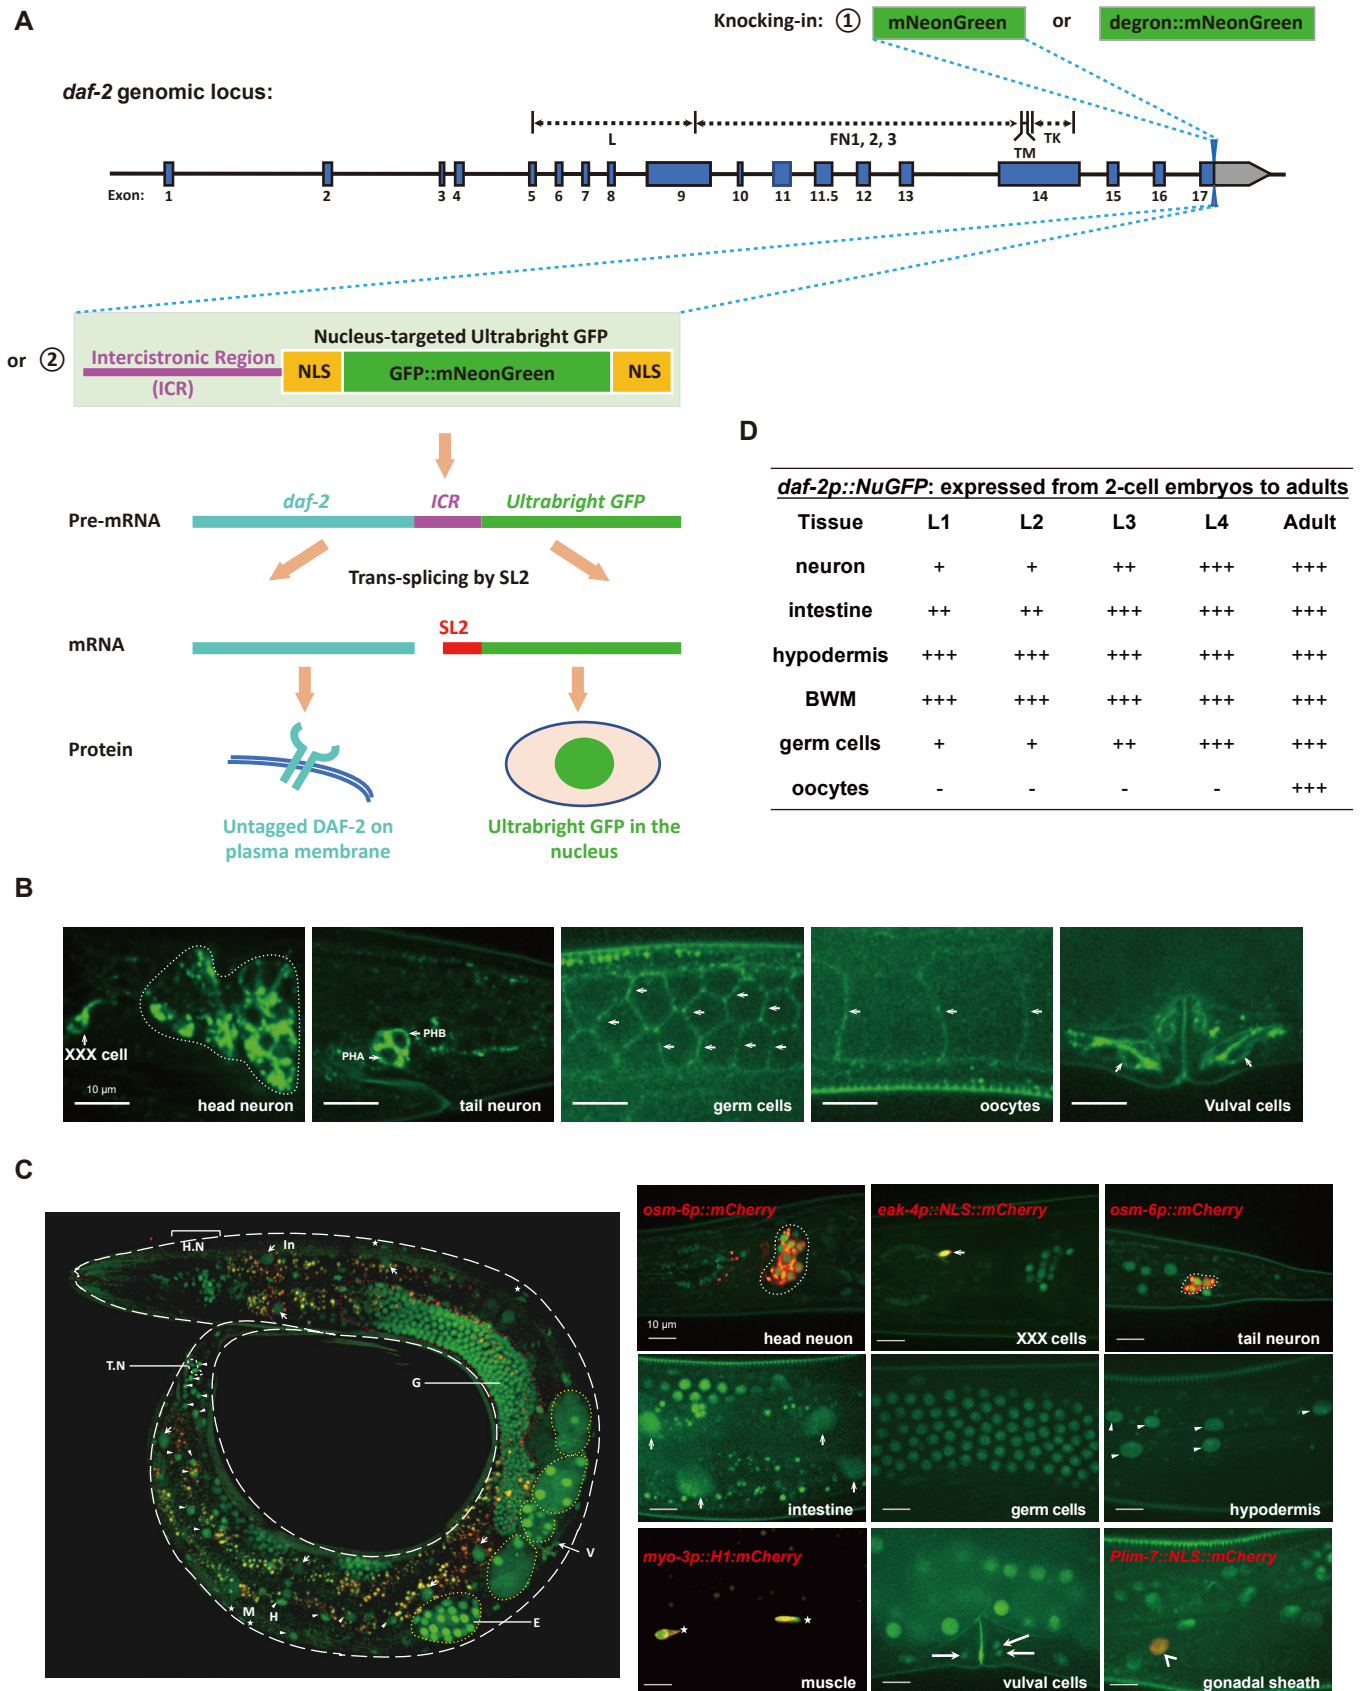

## Figure 2

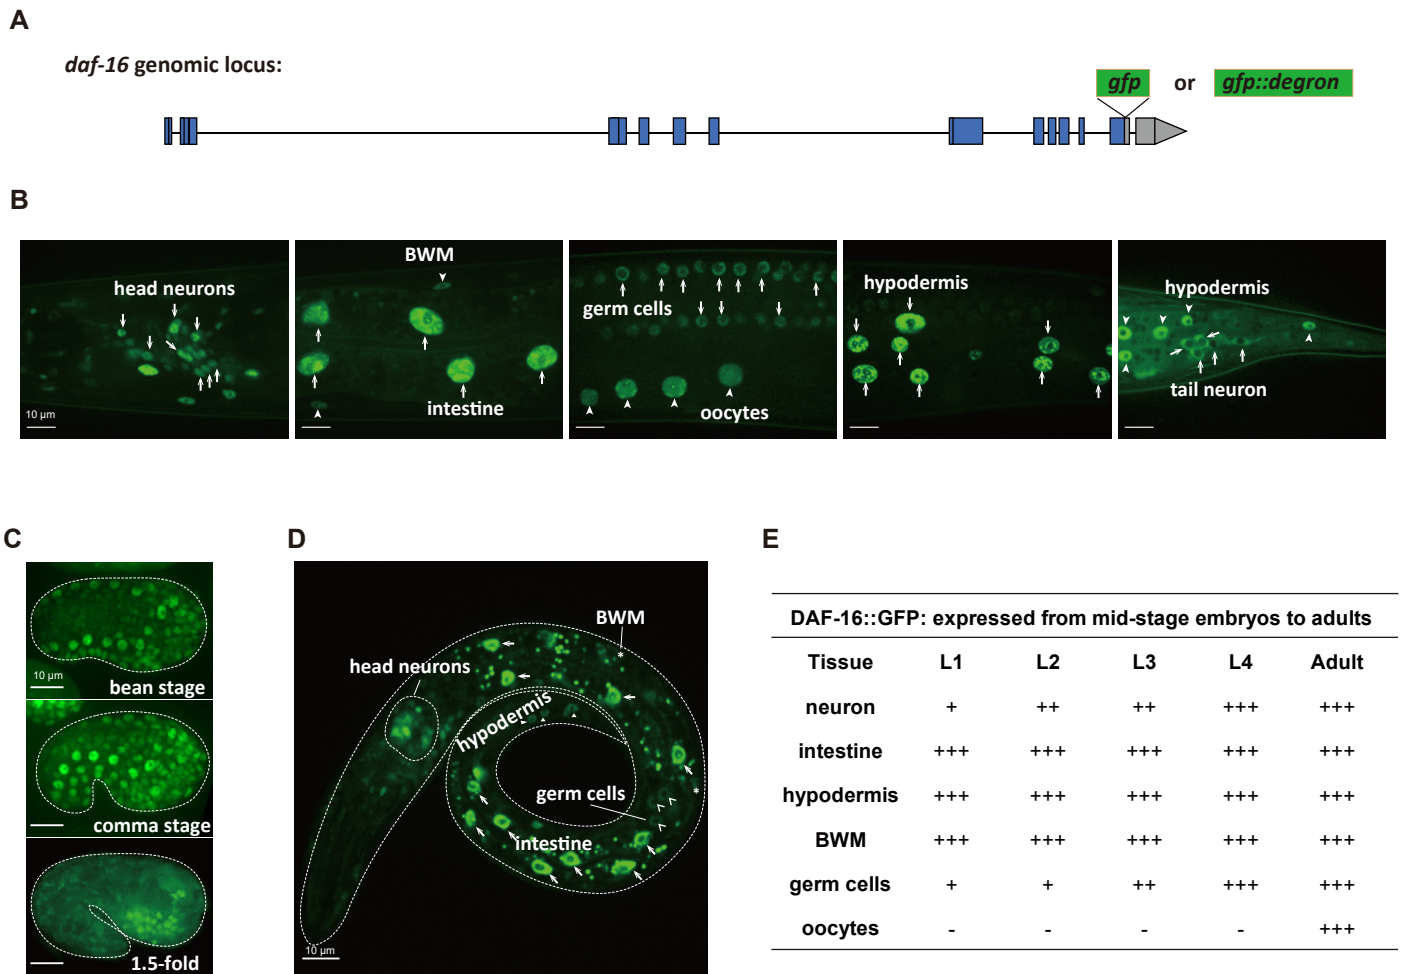

**Figure 3**

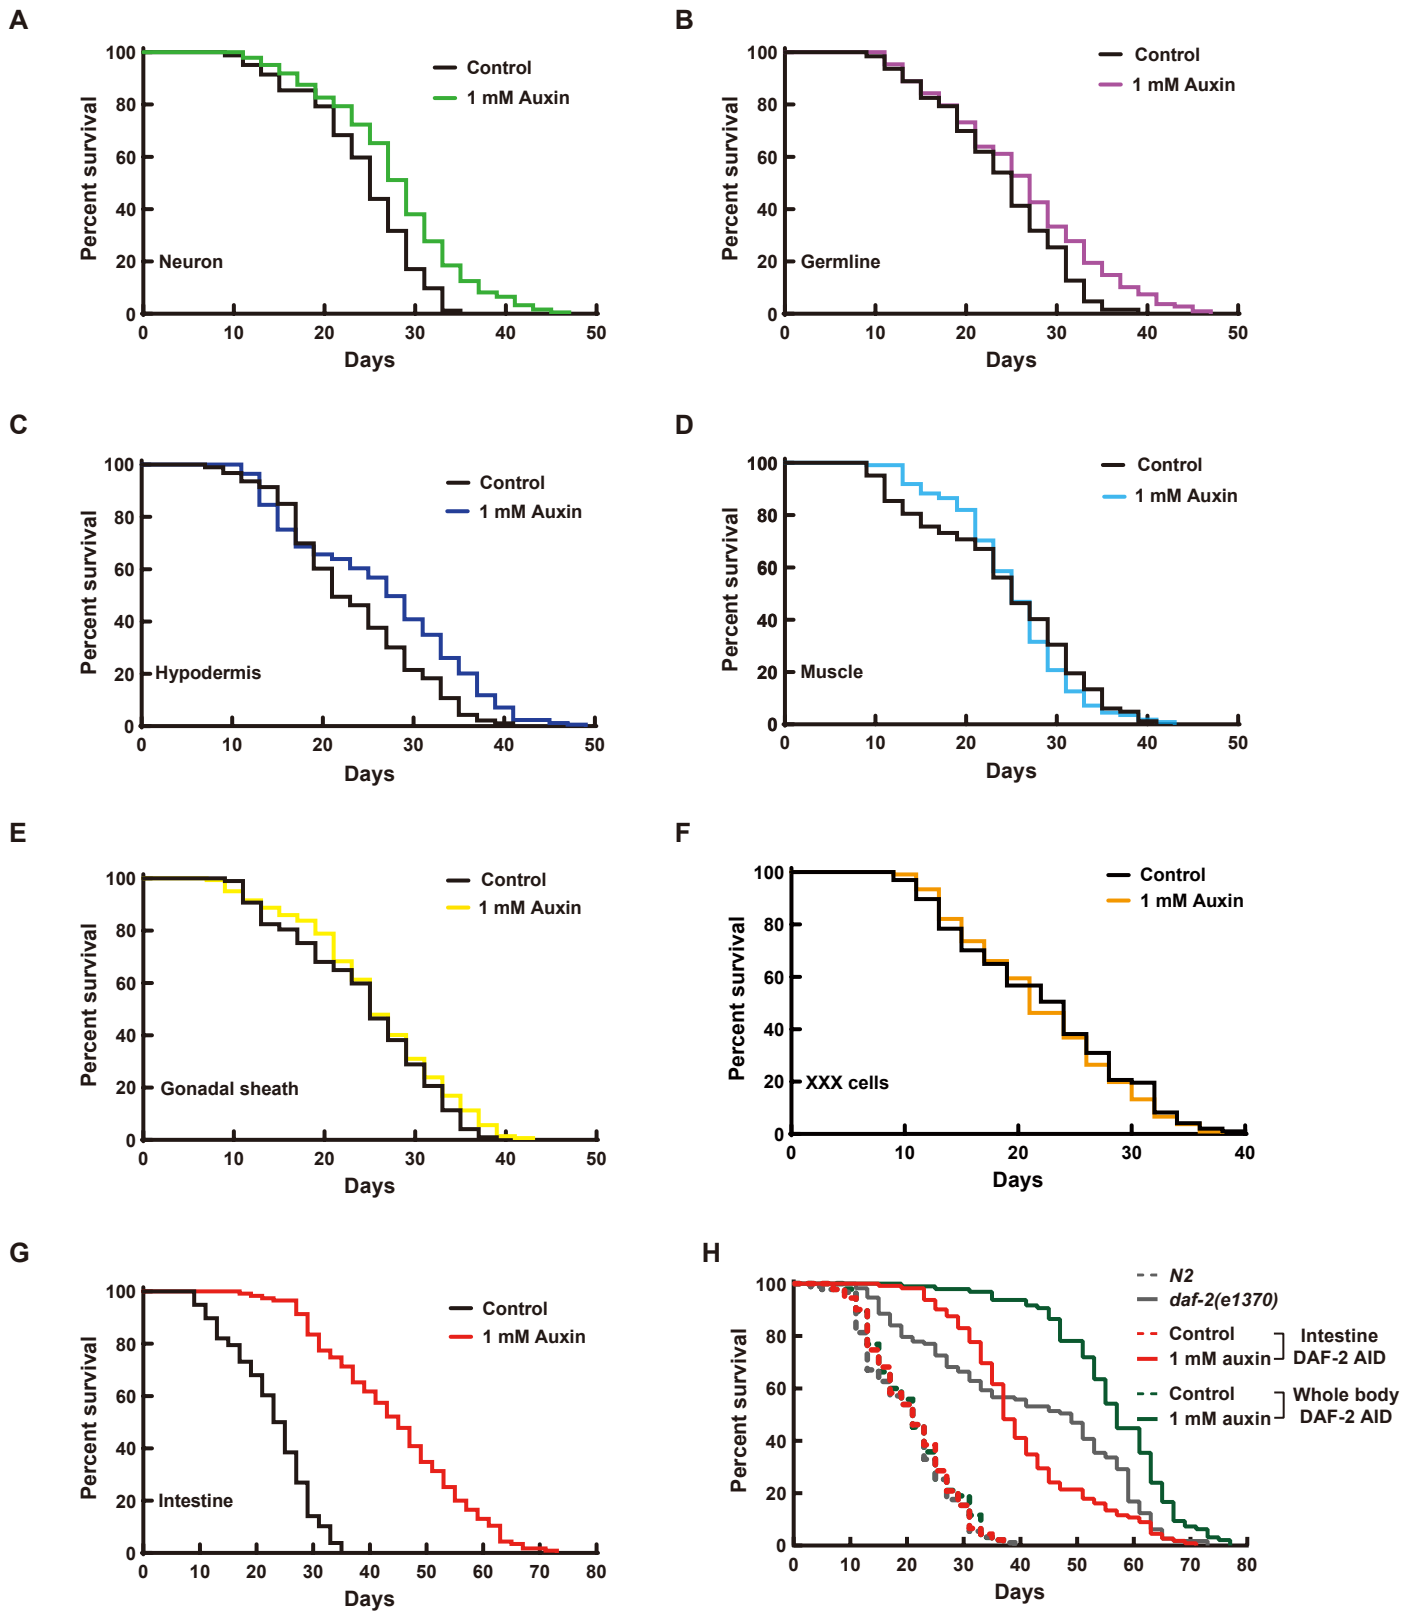

## Figure 4

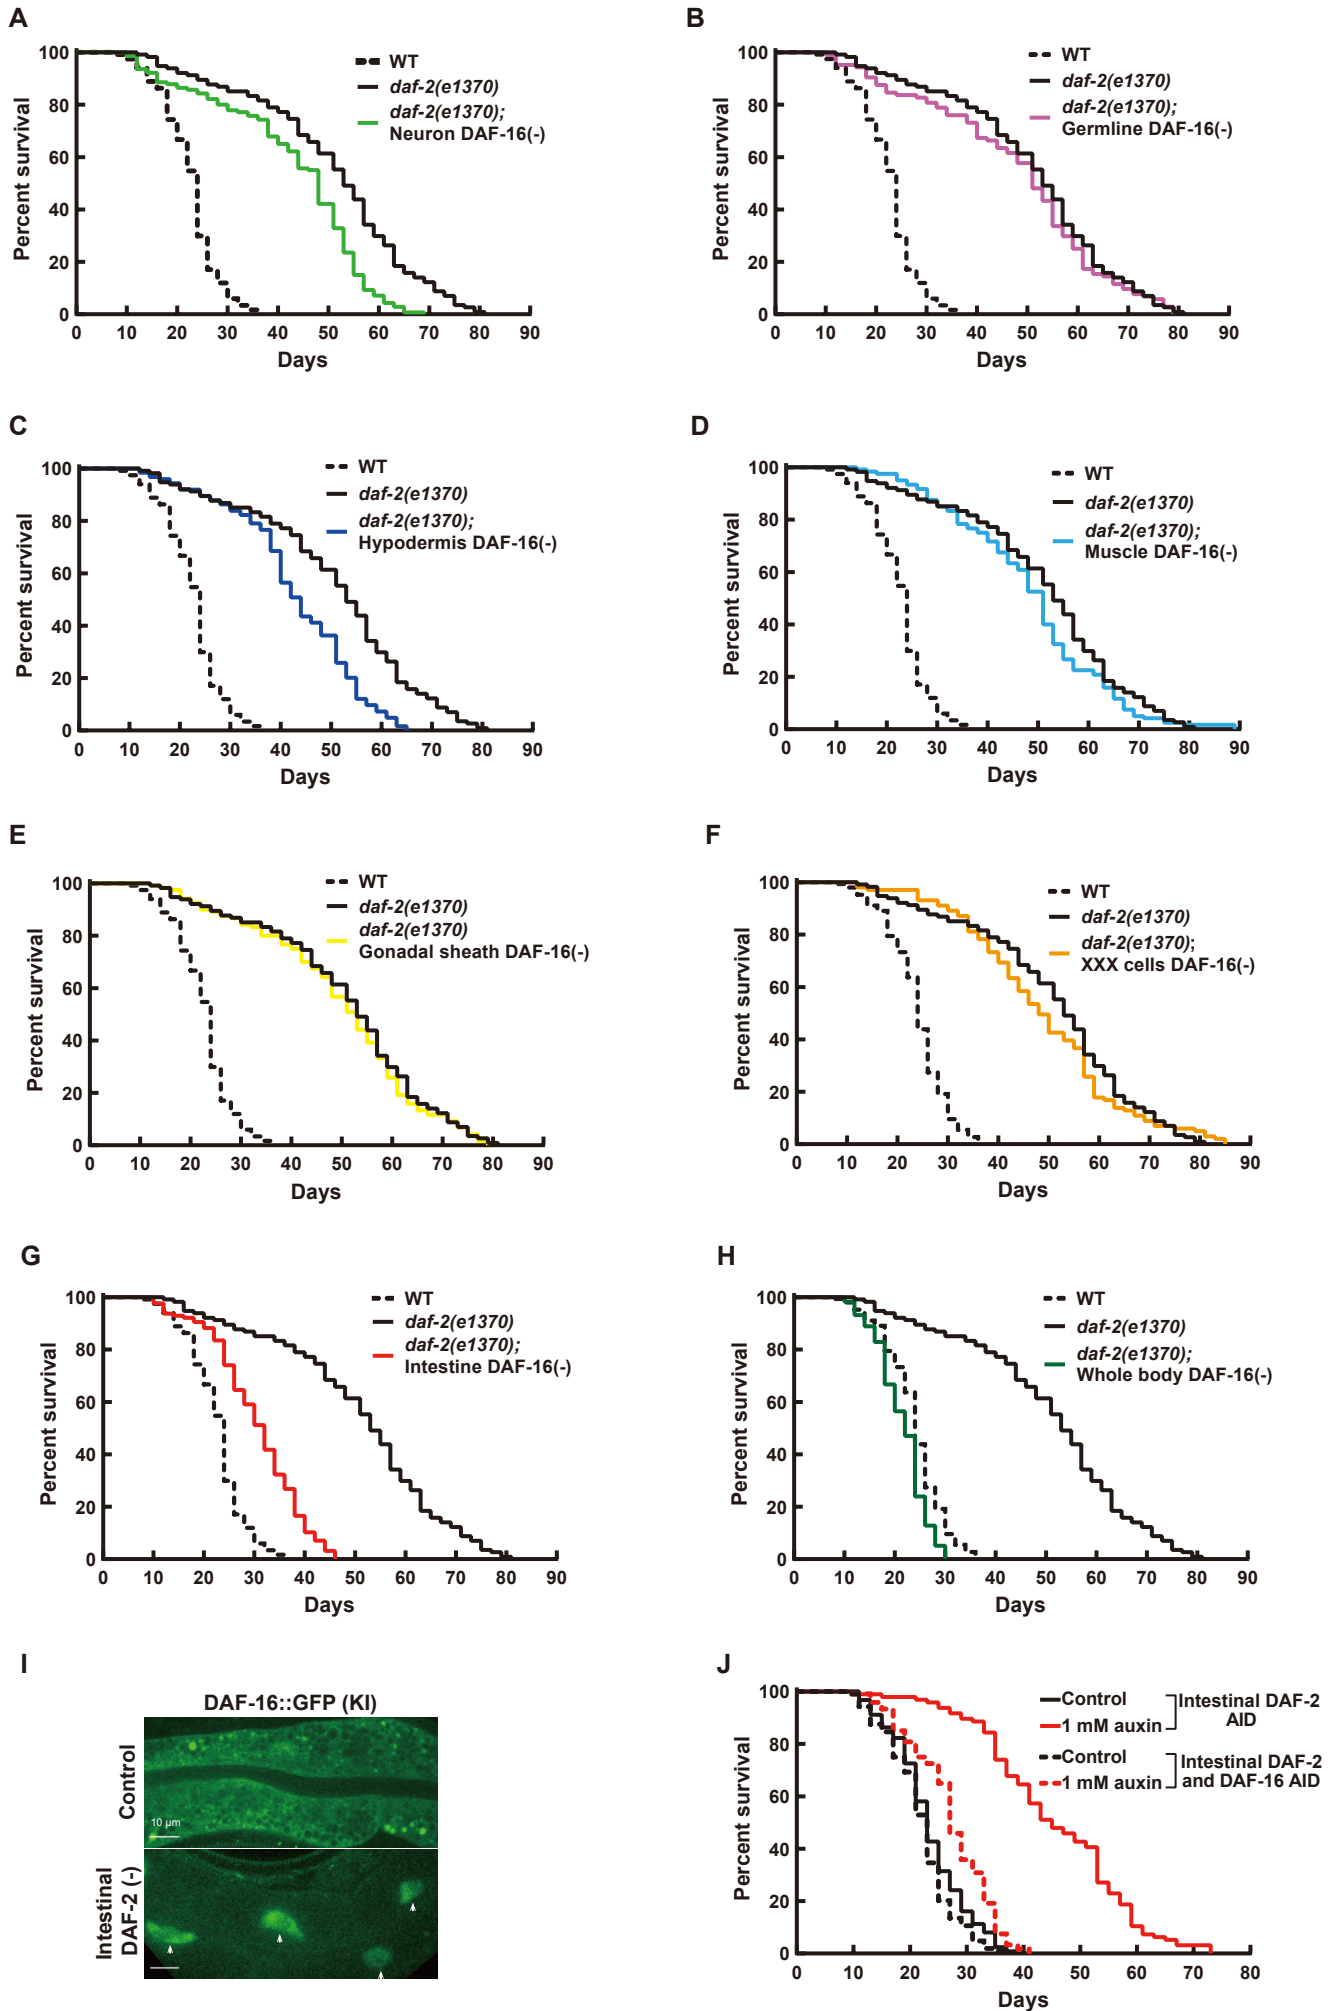

## Figure 5

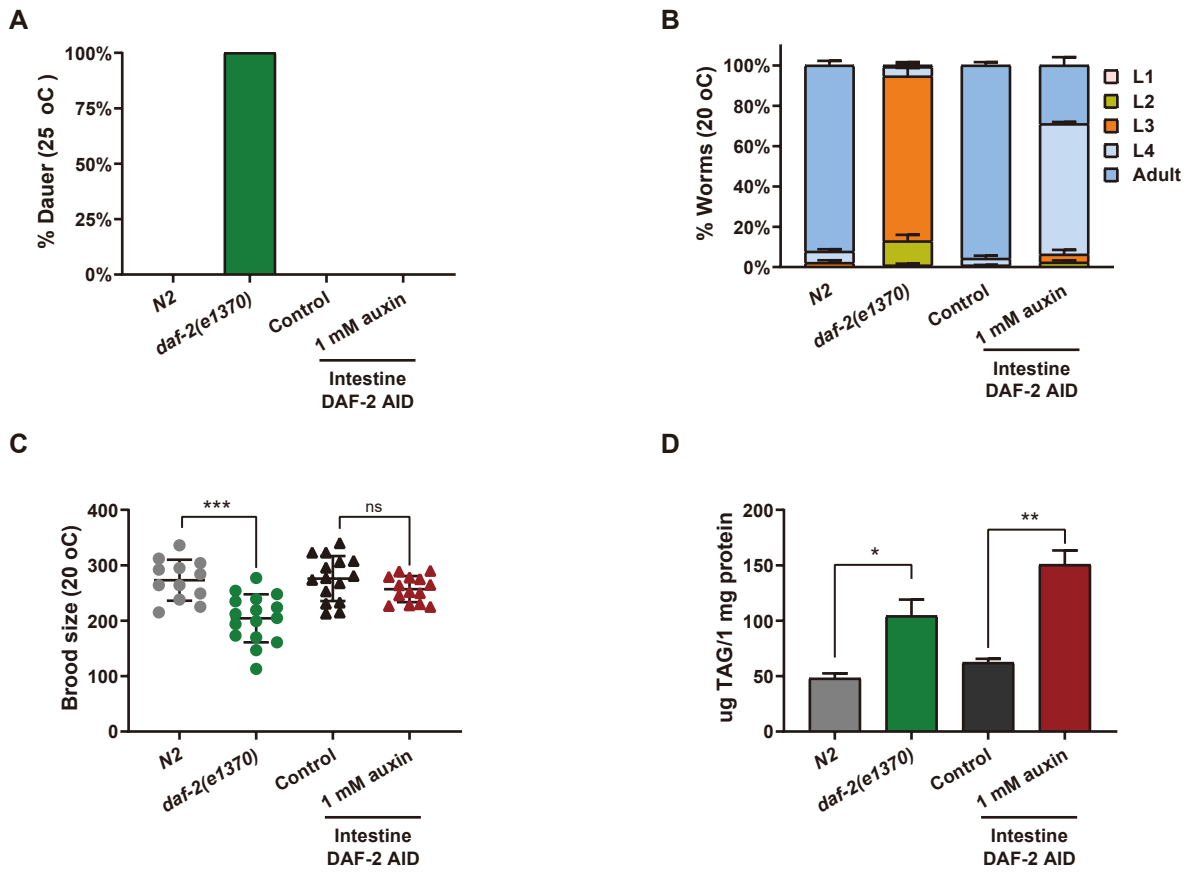



## Figure 6

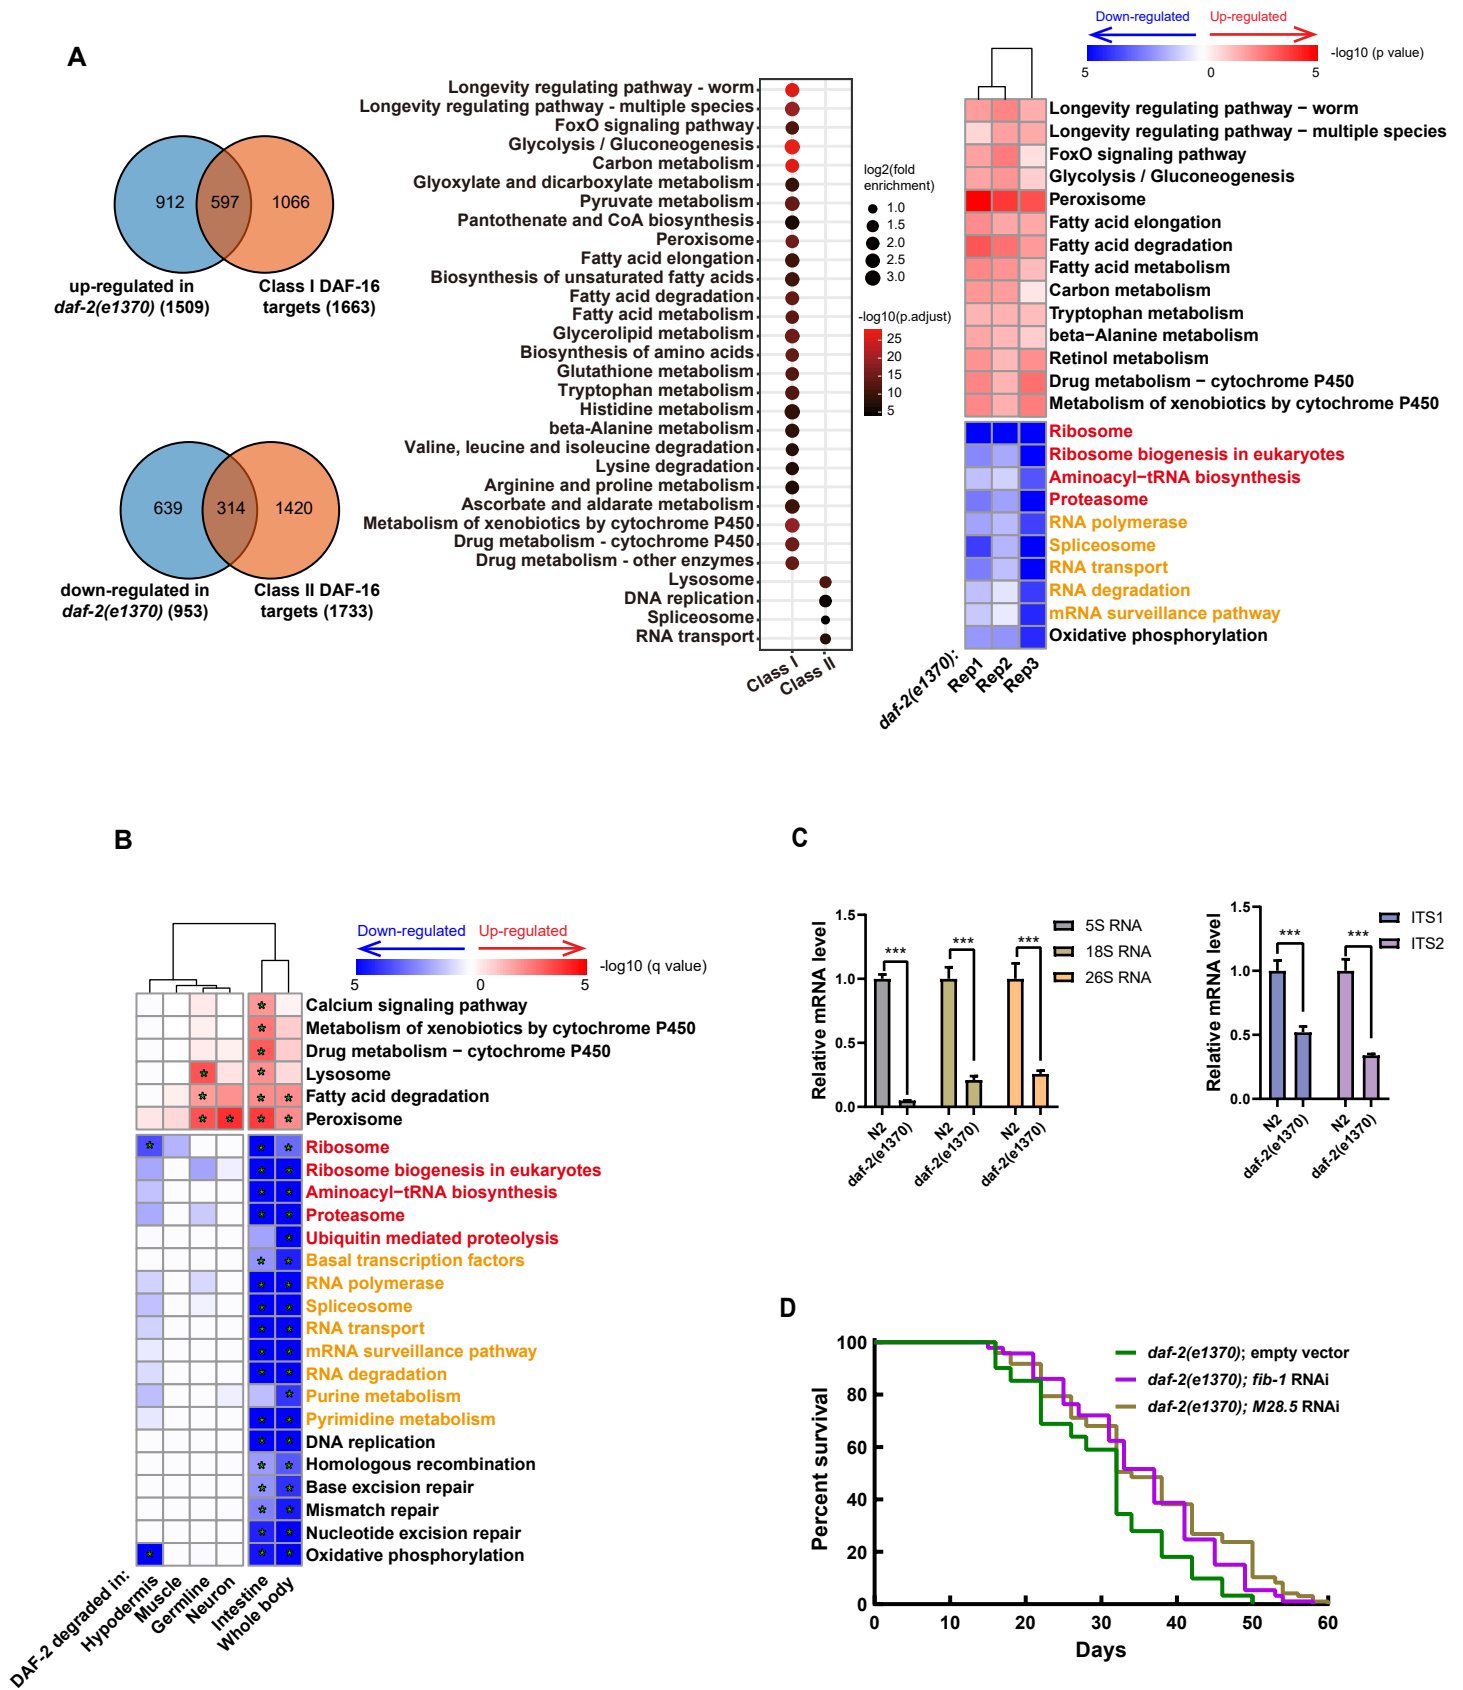

## Figure 7

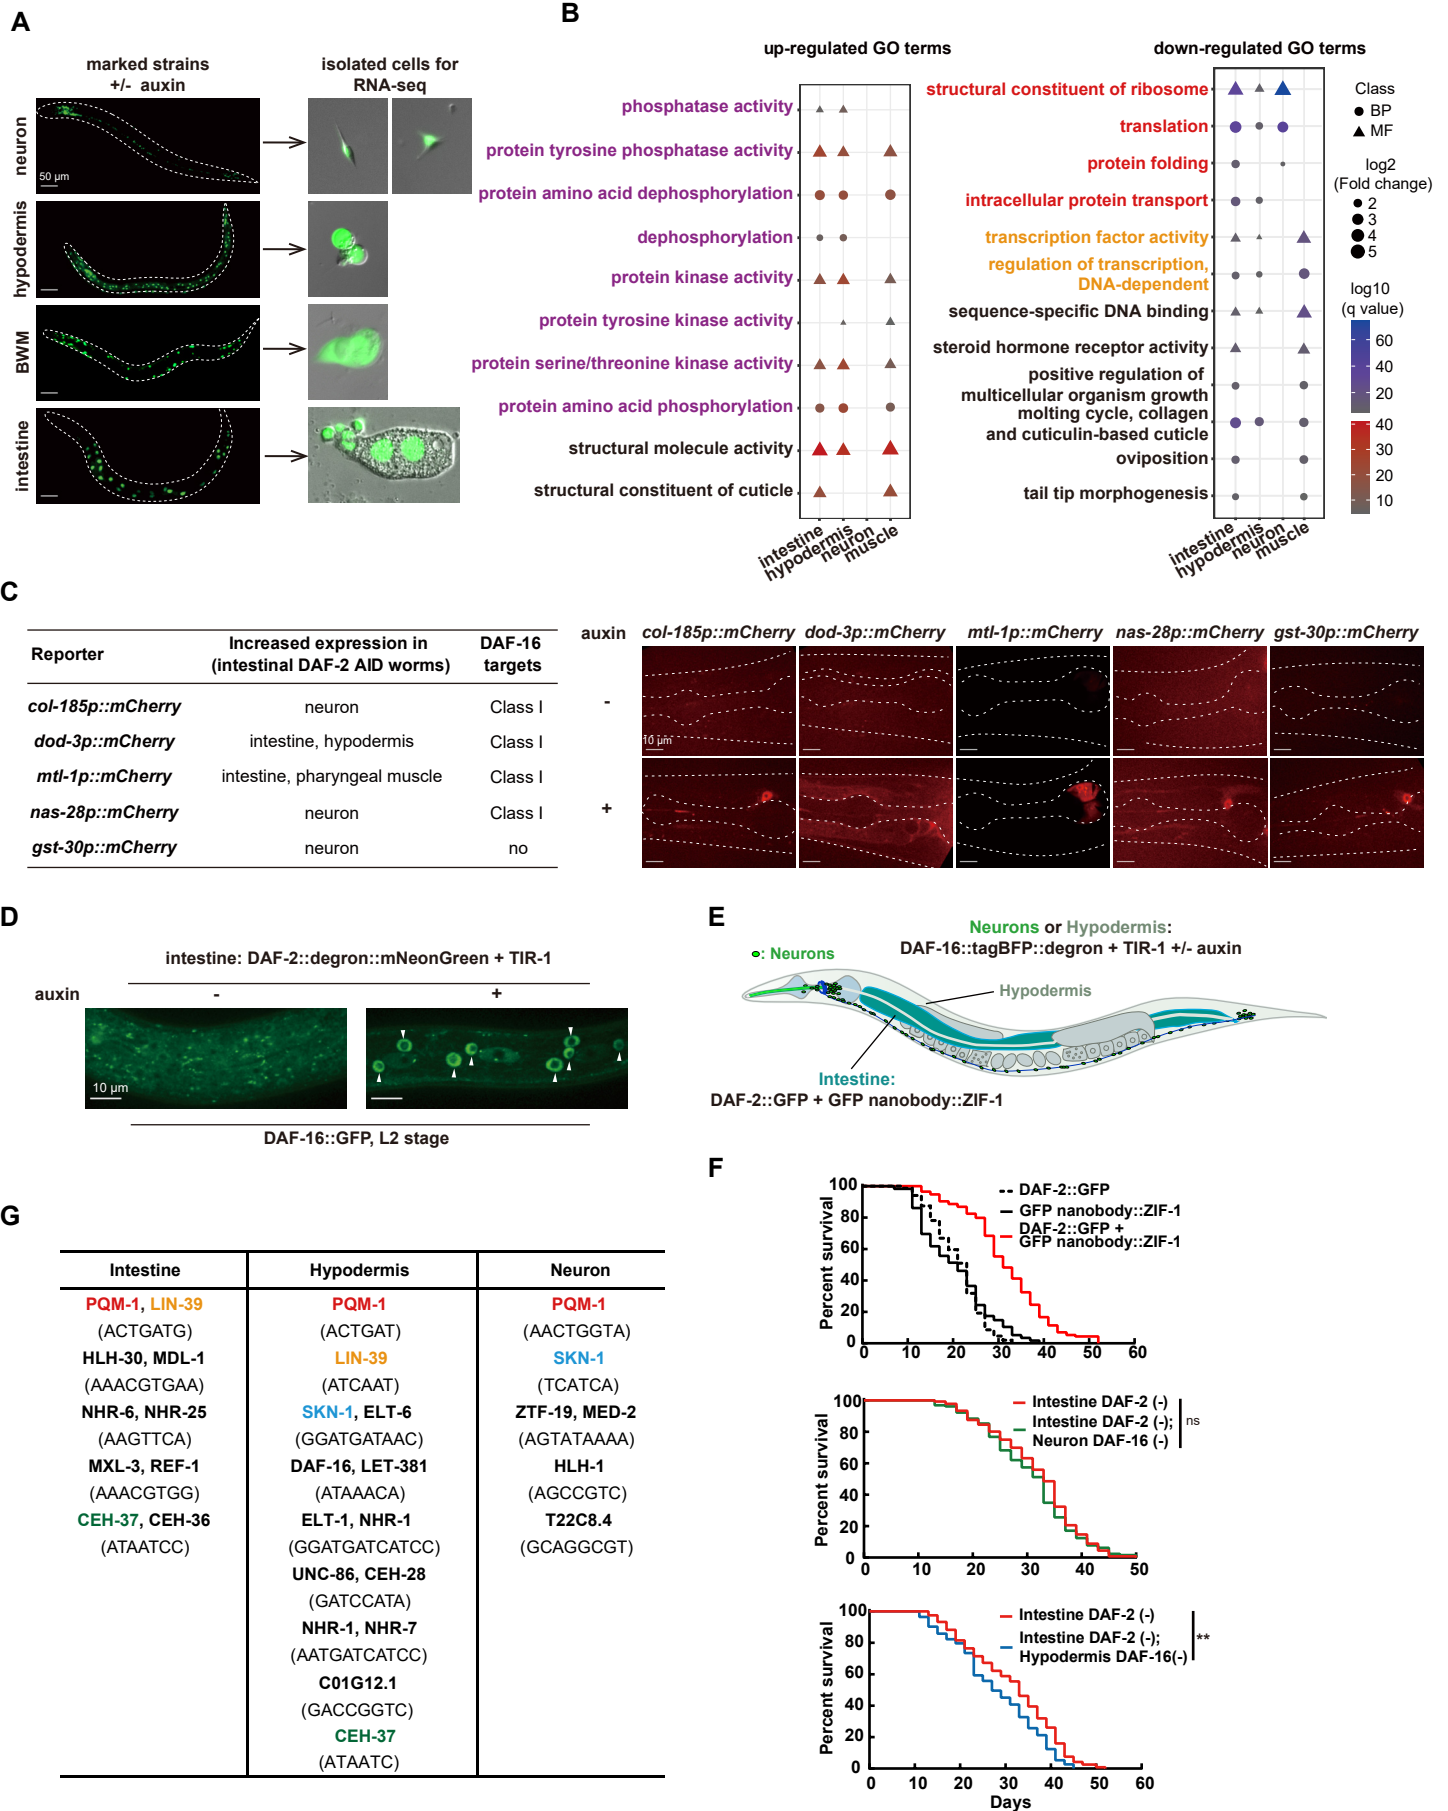

Source: http://biorxiv.org/content/10.1101/2021.07.31.454567v1.full.pdf
